# Supplementary material for: l-Proline catalyzed three-component synthesis of para-naphthoquinone–4-aza-podophyllotoxin hybrids as potent antitumor agents
Source: Royal Society of Chemistry journal article supplement (doi:10.1039/c4ra16372a), 2015-01-01
Supplement: c4ra16372a1.pdf [file c4ra16372a1.pdf]

# L-Proline catalyzed three-component synthesis of *para*-naphthoquinone- 4- aza-podophyllotoxin hybrids as potent antitumor agents

Xiaojuan Yang,<sup>a</sup> Chong Zhang,<sup>b</sup> Liqiang wu<sup>b,\*</sup>

<sup>a</sup> College of Chemistry and Chemical Engineering, Xinxiang University, Xinxiang, Henan 453003, China

<sup>b</sup> School of Pharmacy, Xinxiang Medical University, Xinxiang 453003, China

## Content

Copy of IR, <sup>1</sup>H NMR and <sup>13</sup>C NMR..... 1-28

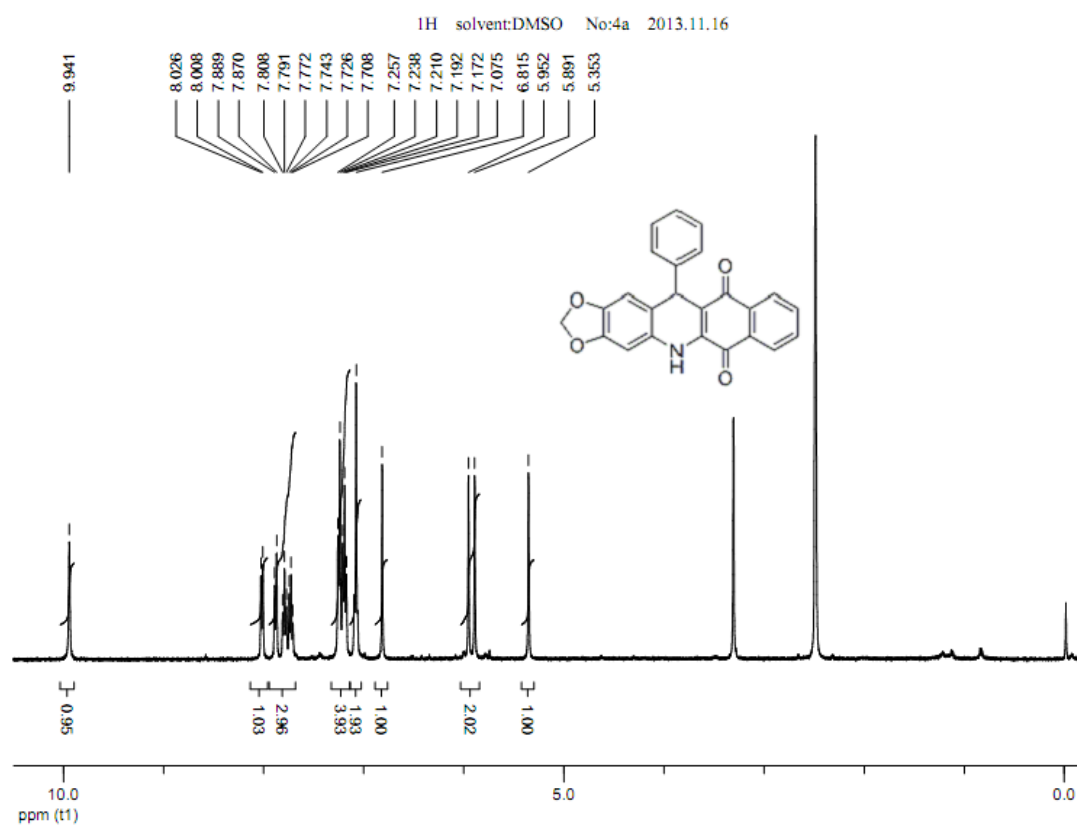

Figure 1. <sup>1</sup>H NMR of 4a

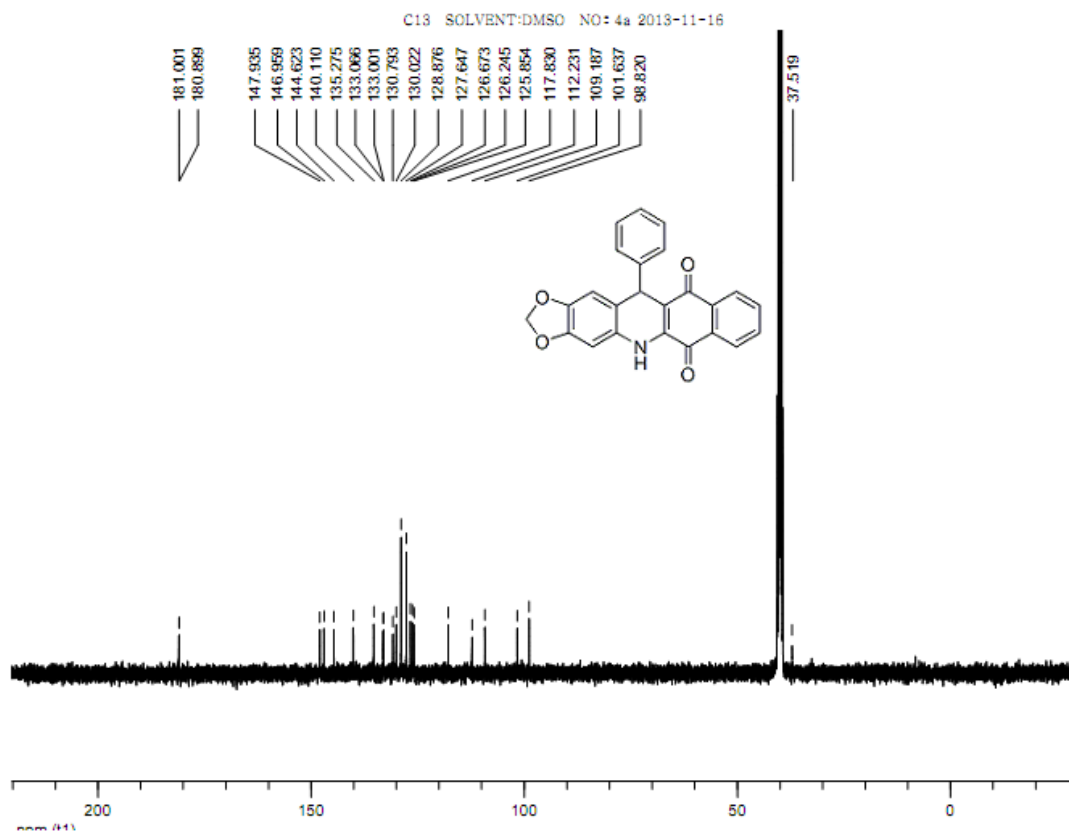

Figure 2.  $^{13}\text{C}$  NMR of 4a

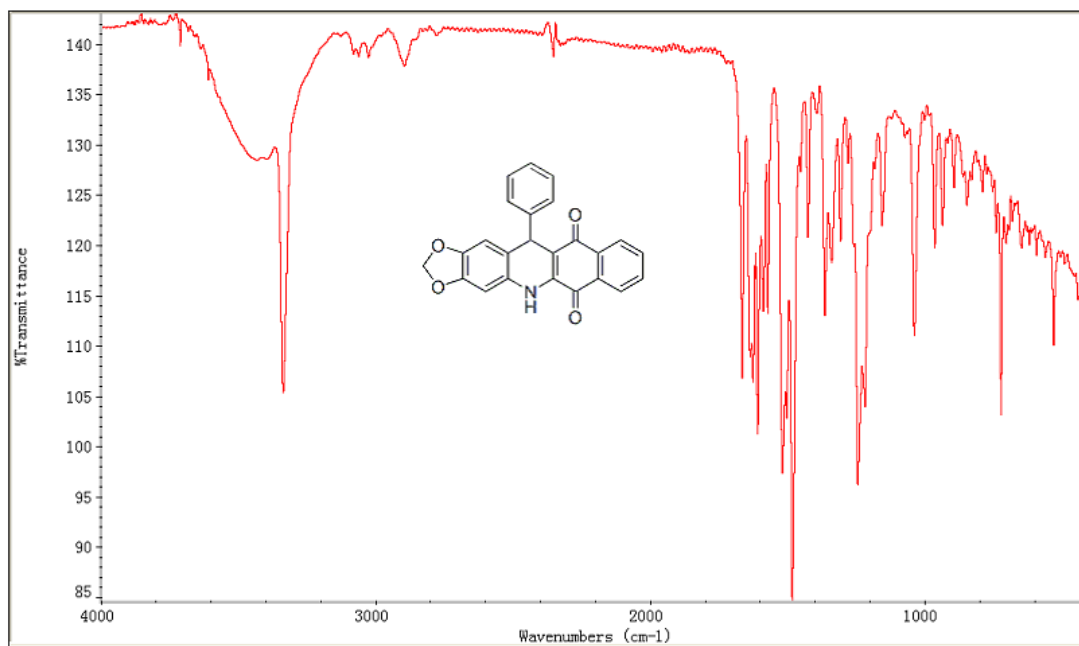

Figure 3. IR of 4a

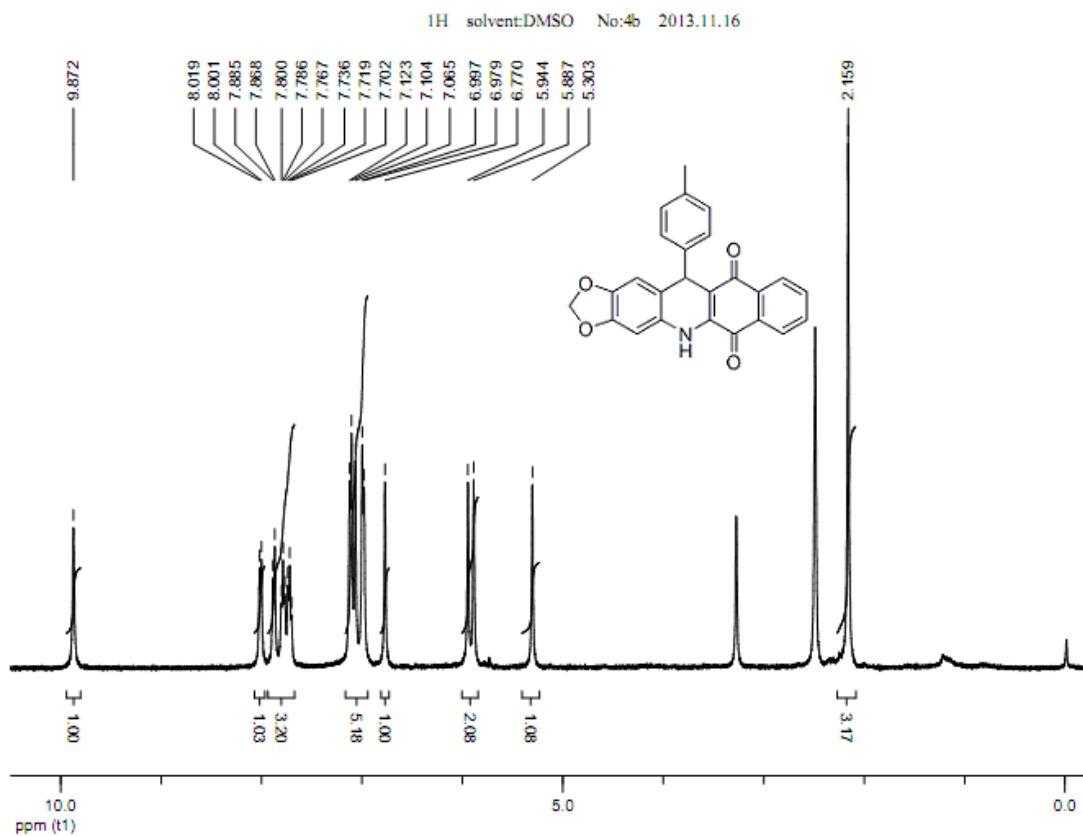

Figure 4.  $^1\text{H}$  NMR of 4b

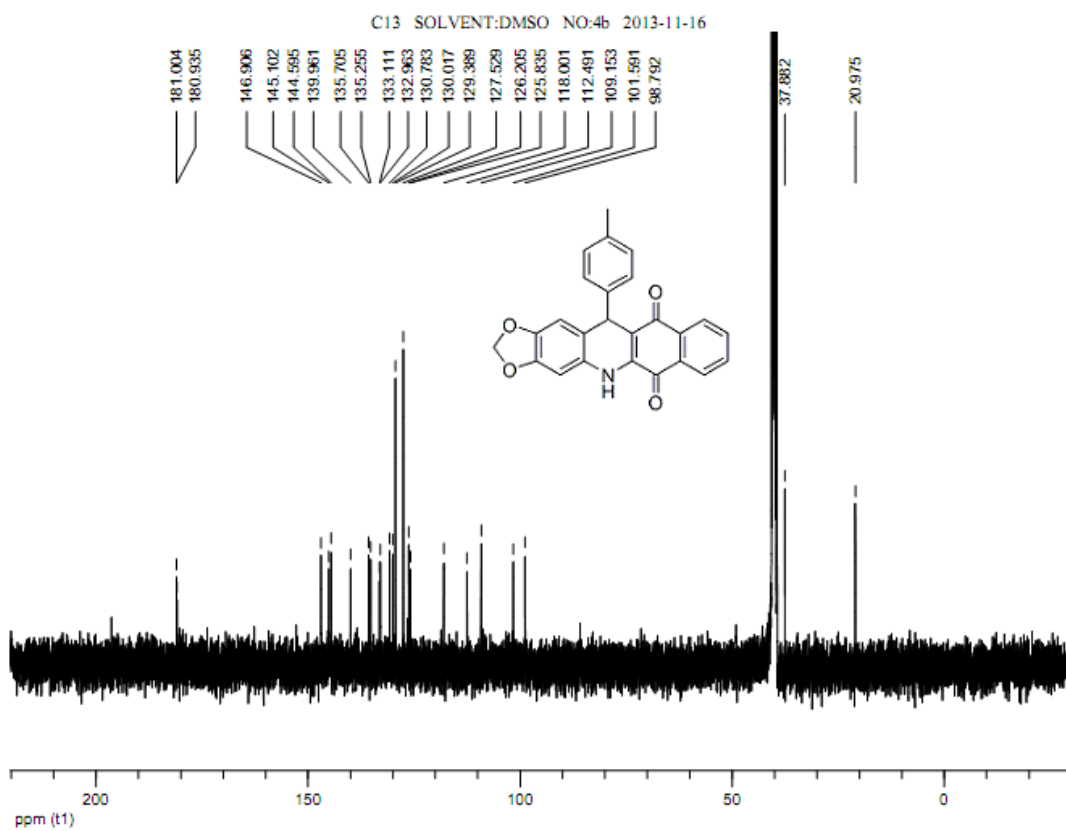

Figure 5.  $^{13}\text{C}$  NMR of 4b

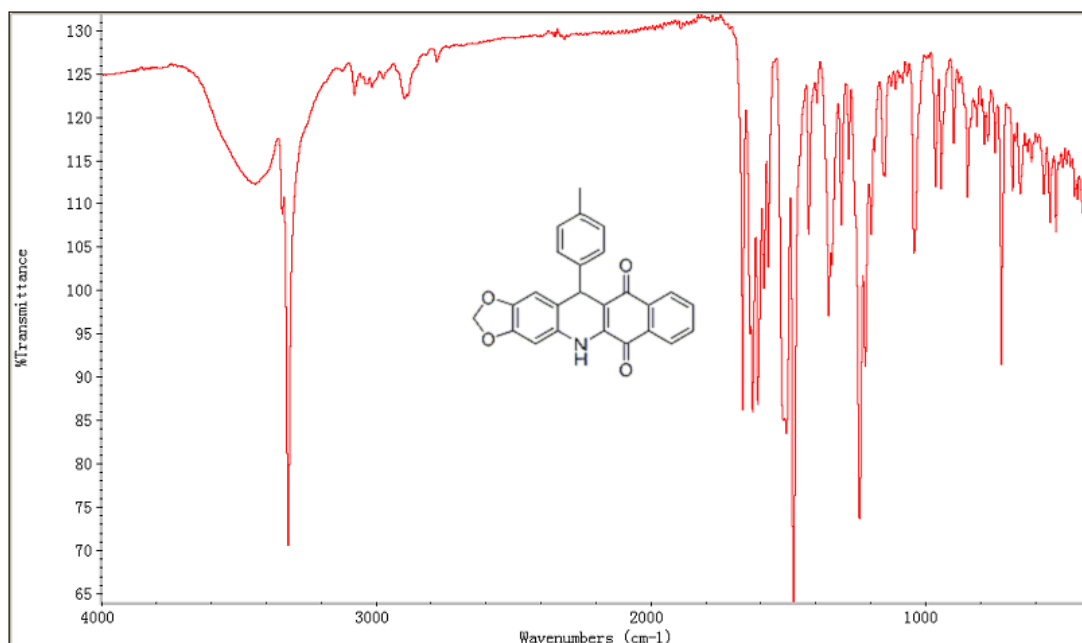

Figure 6. IR of 4b

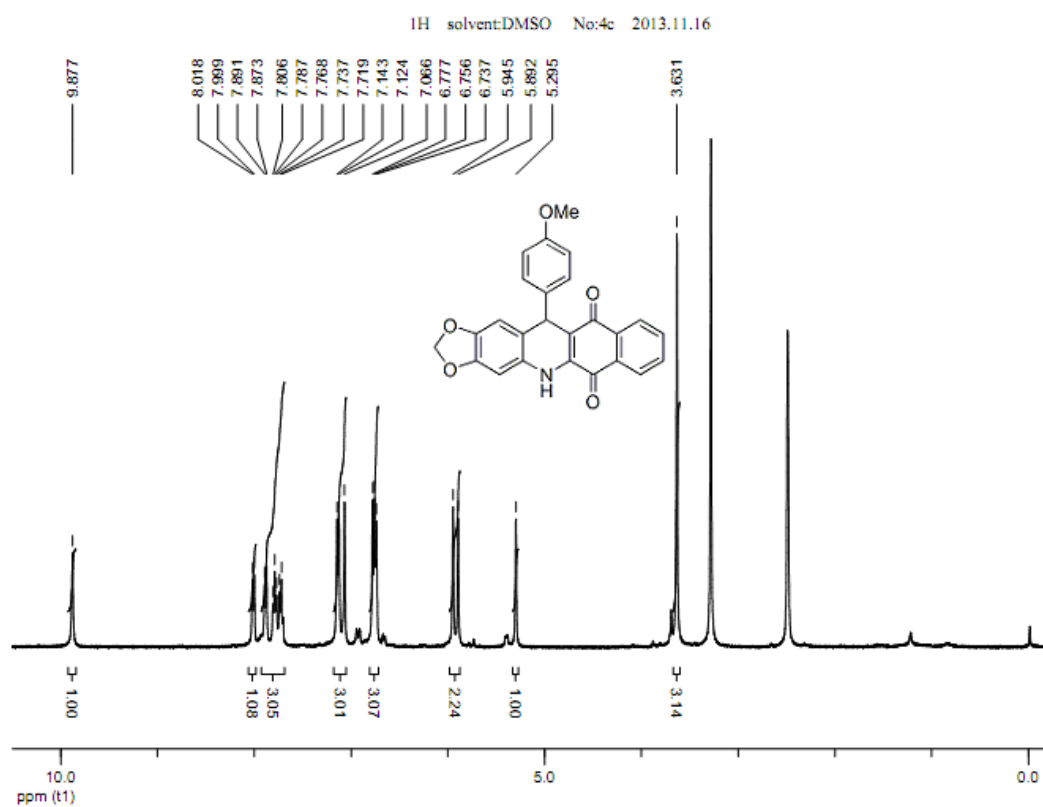

Figure 7. <sup>1</sup>H NMR of 4c

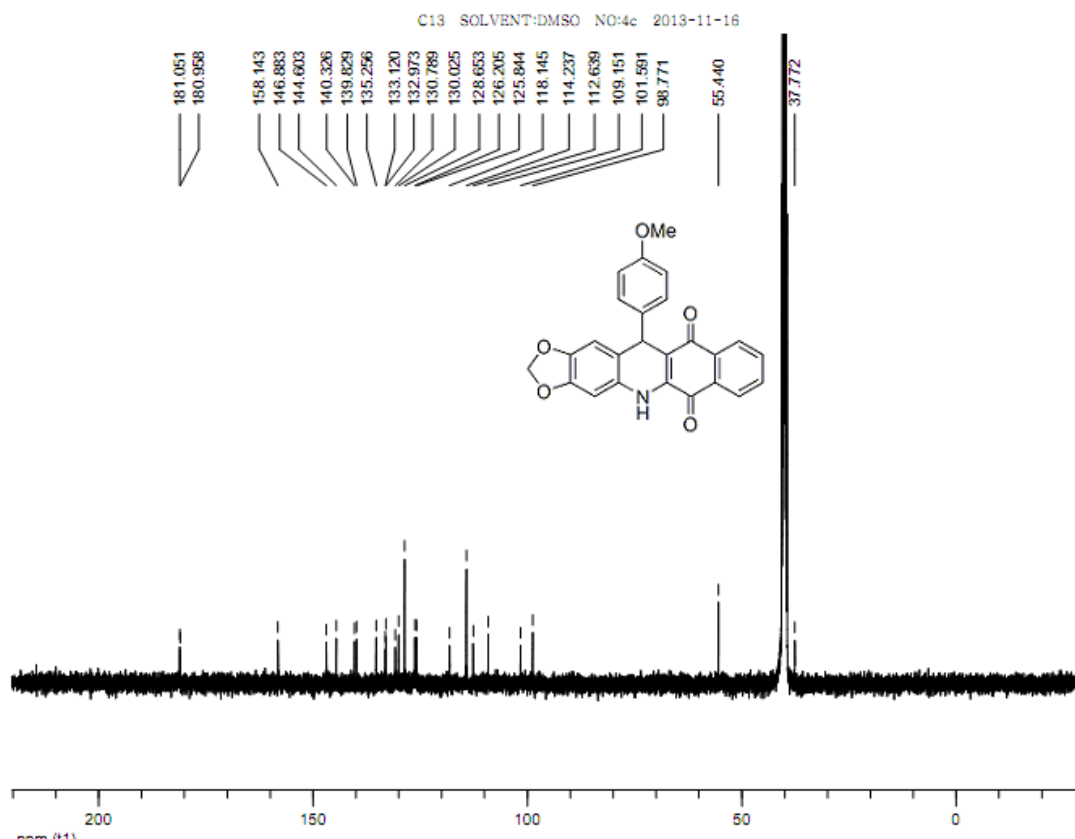

**Figure 8.**  $^{13}$ HNMR of **4c**

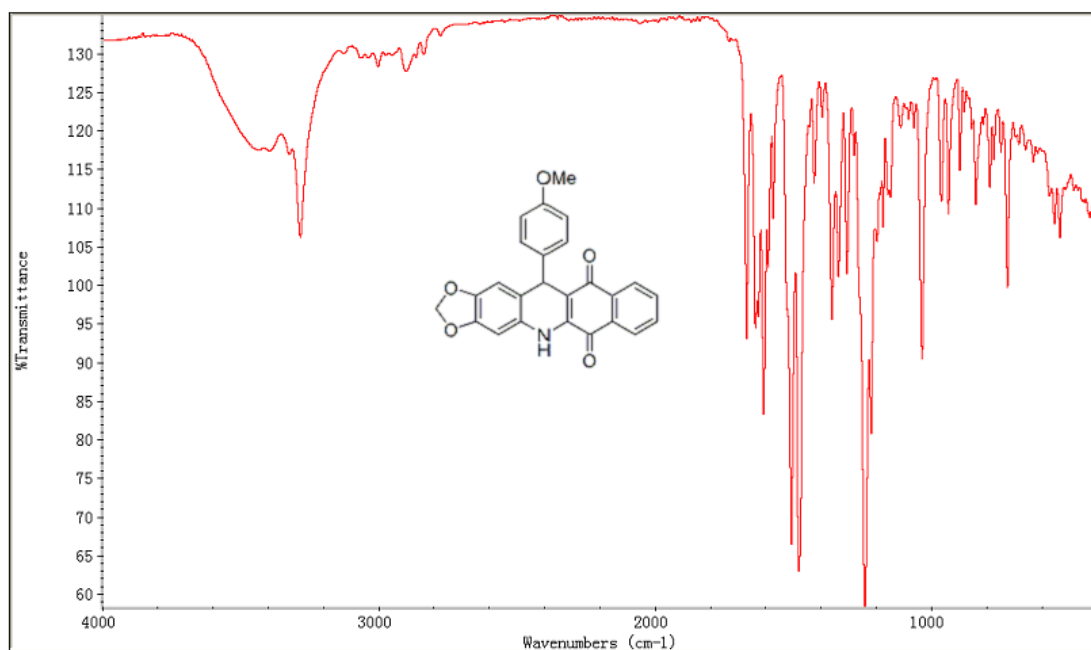

**Figure 9.** IR of **4c**

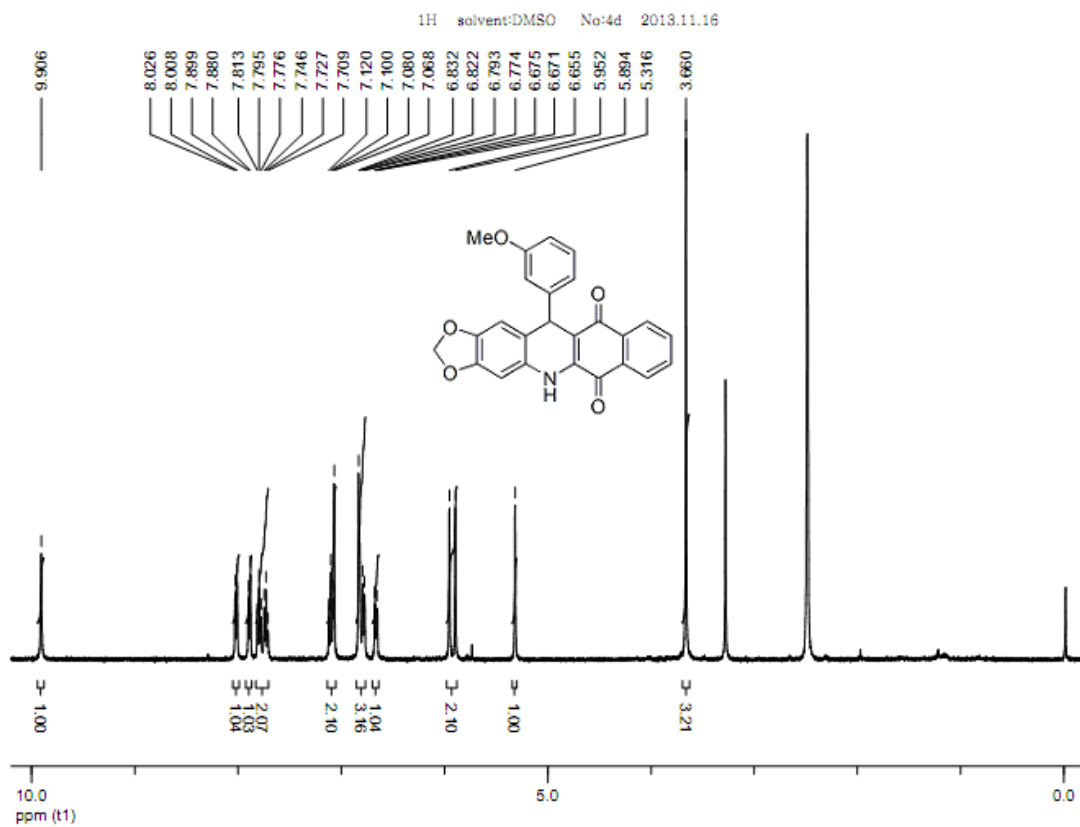

Figure 10. <sup>1</sup>H NMR of 4d

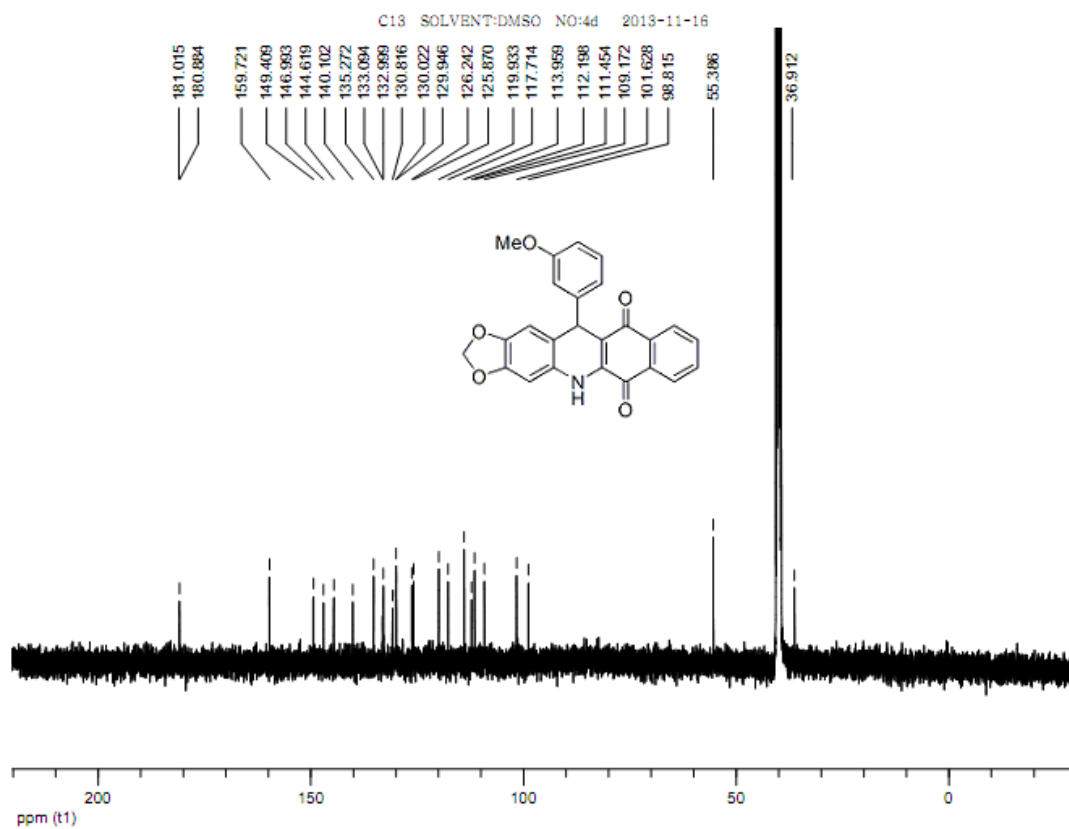

Figure 11.  $^{13}\text{C}$  NMR of 4d

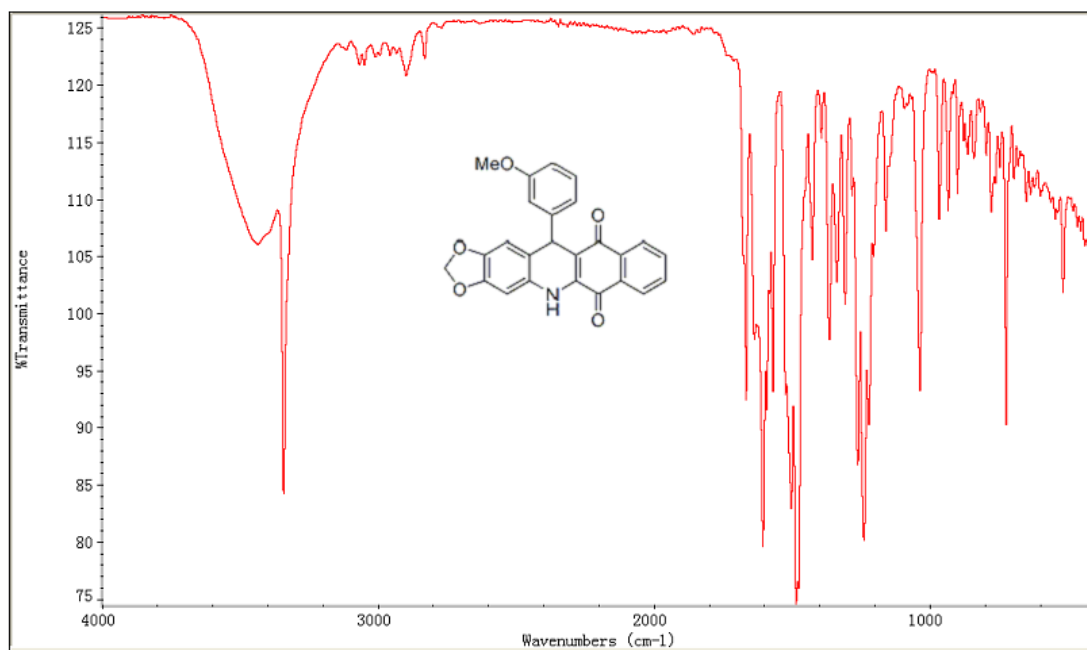

Figure 12. IR of 4d

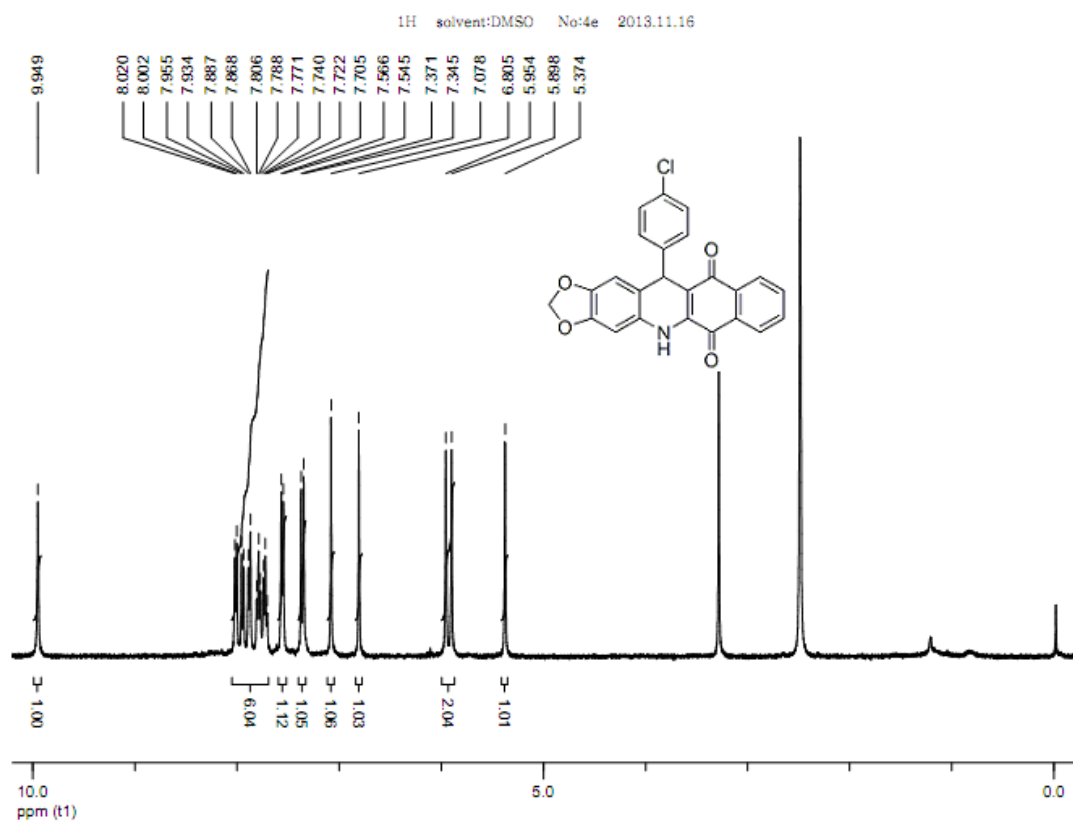

Figure 13.  $^1\text{H}$  NMR of 4e

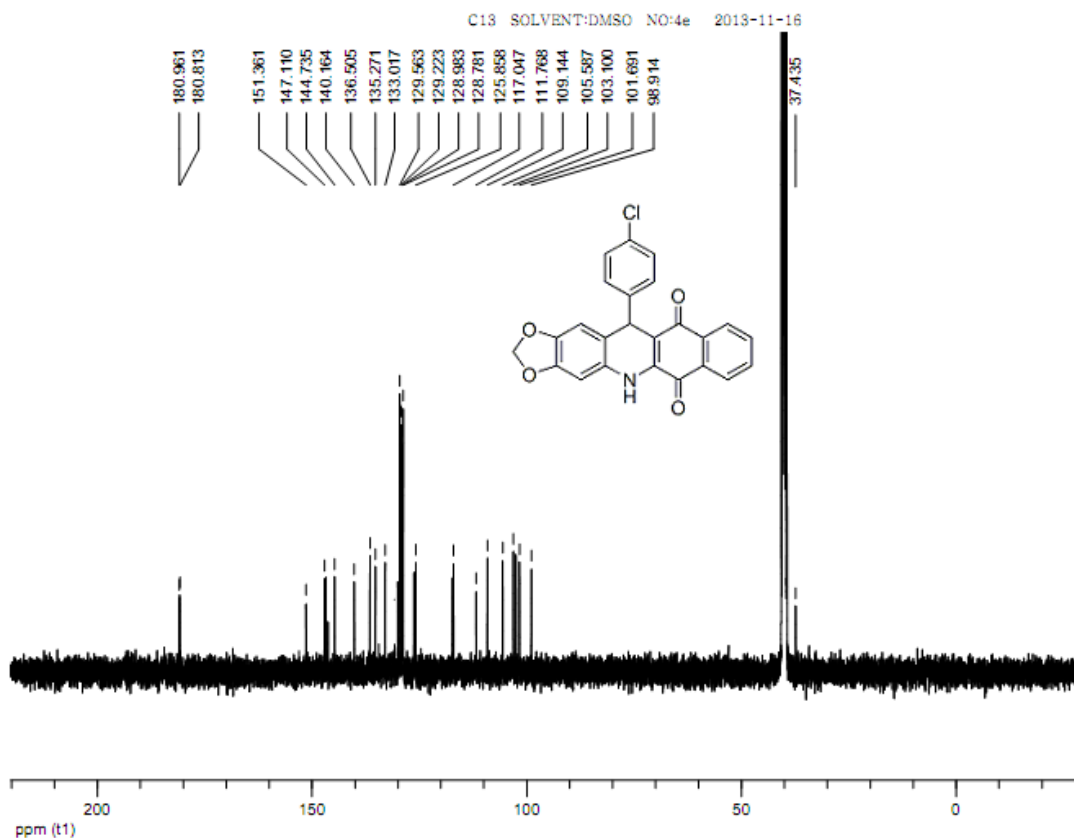

Figure 14.  $^{13}\text{C}$  NMR of 4e

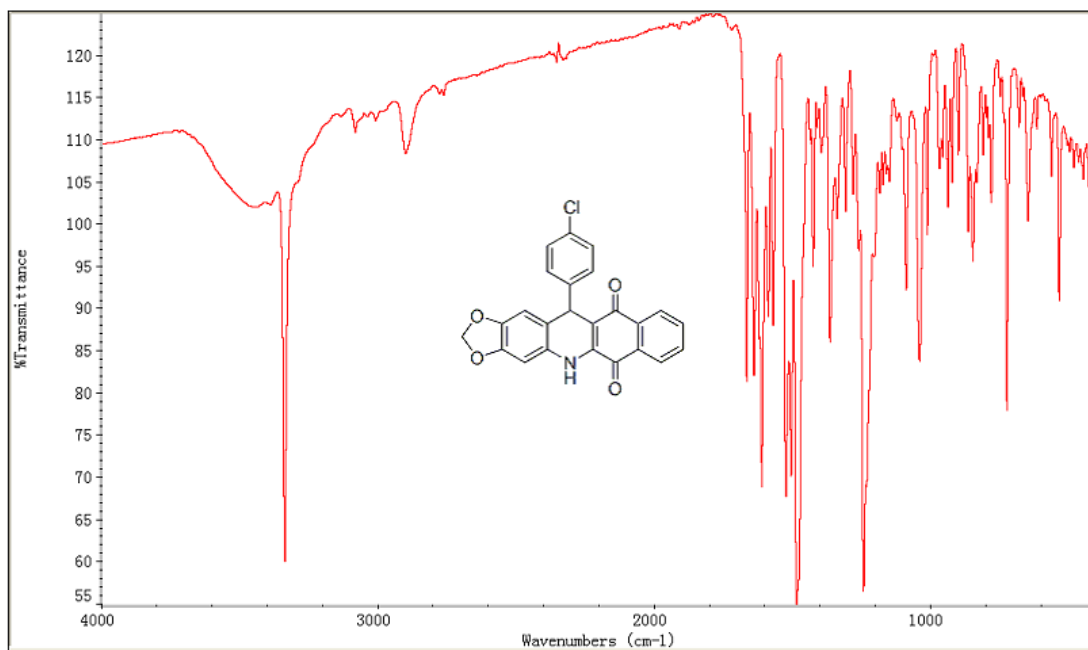

Figure 15. IR of 4e



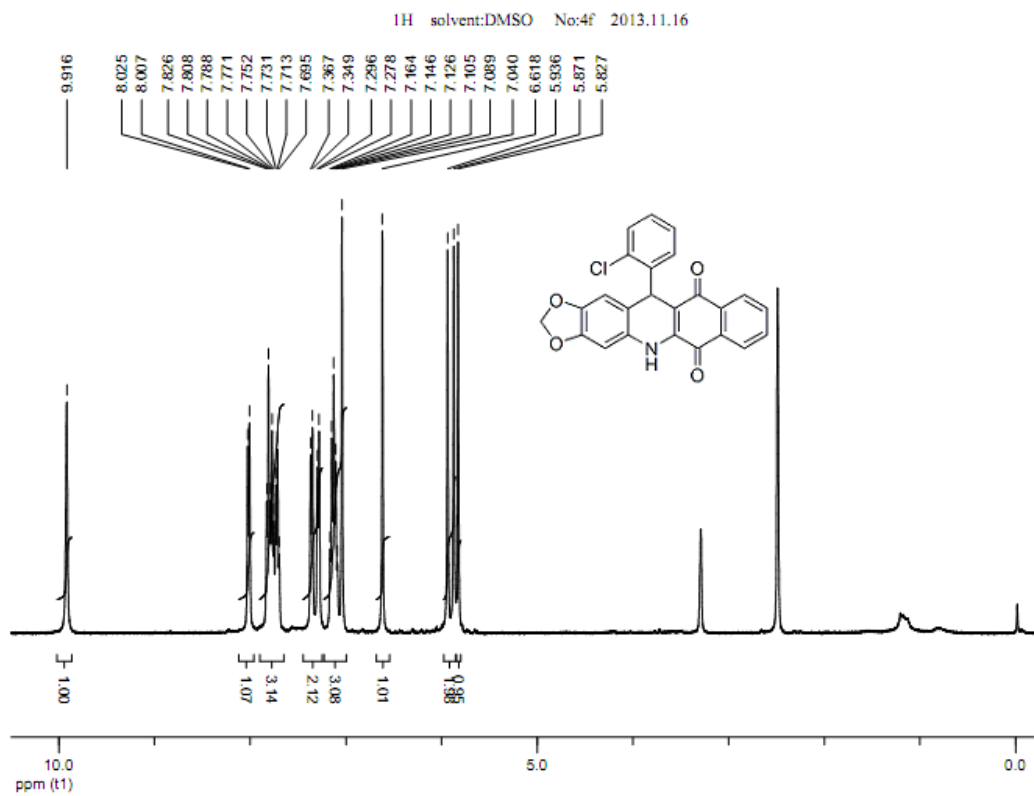

Figure 16.  $^1\text{H}$  NMR of 4f

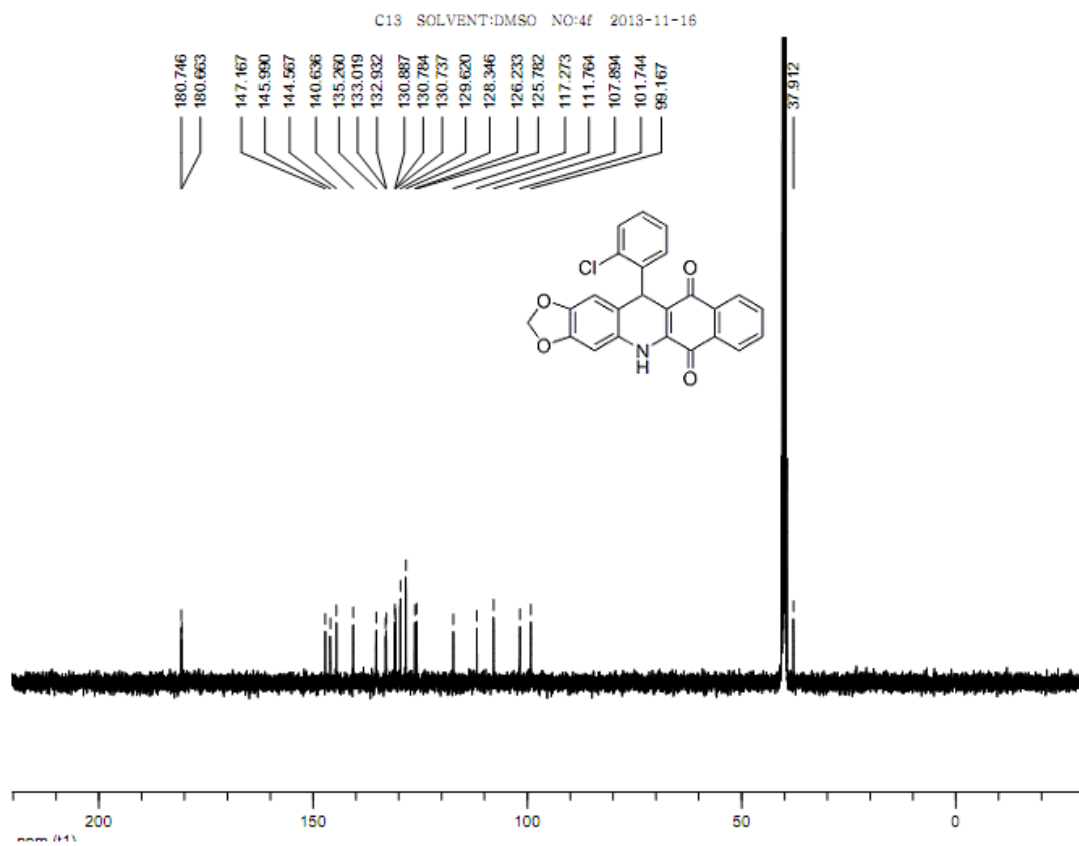

Figure 17.  $^{13}\text{C}$  NMR of 4f

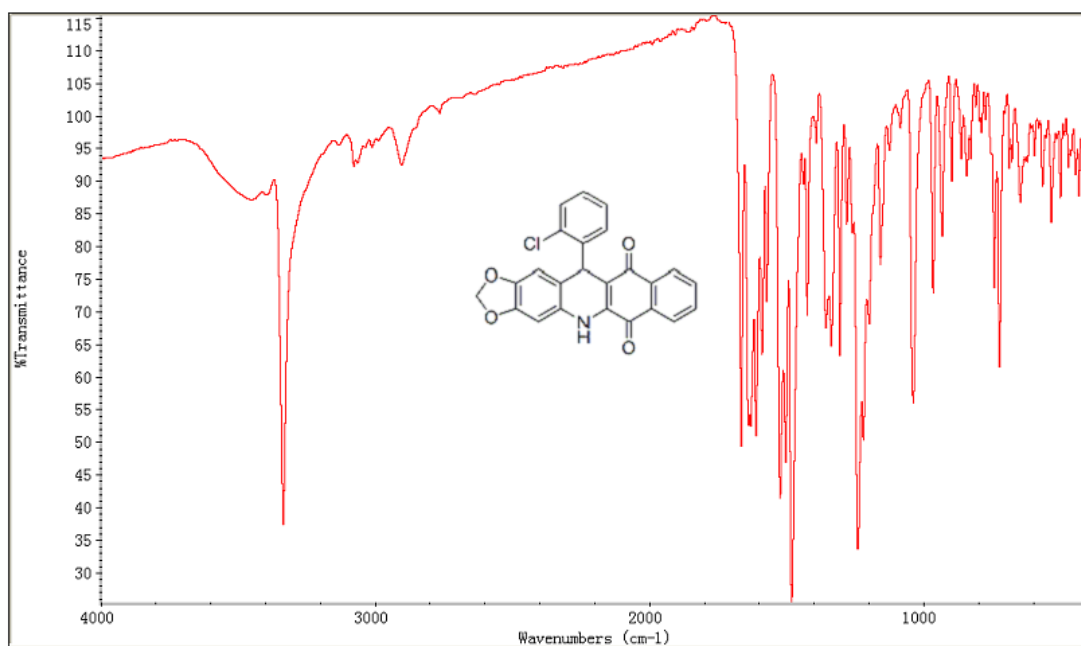

Figure 18. IR of 4f

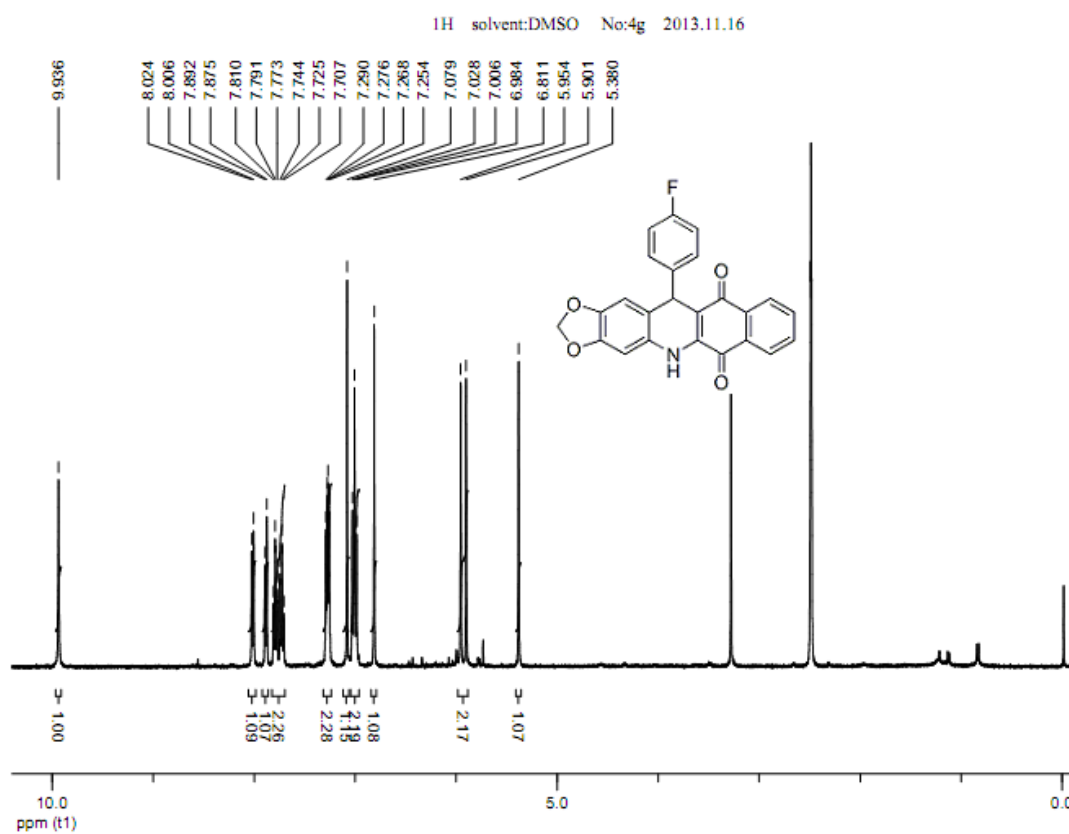

Figure 19. <sup>1</sup>H NMR of 4g

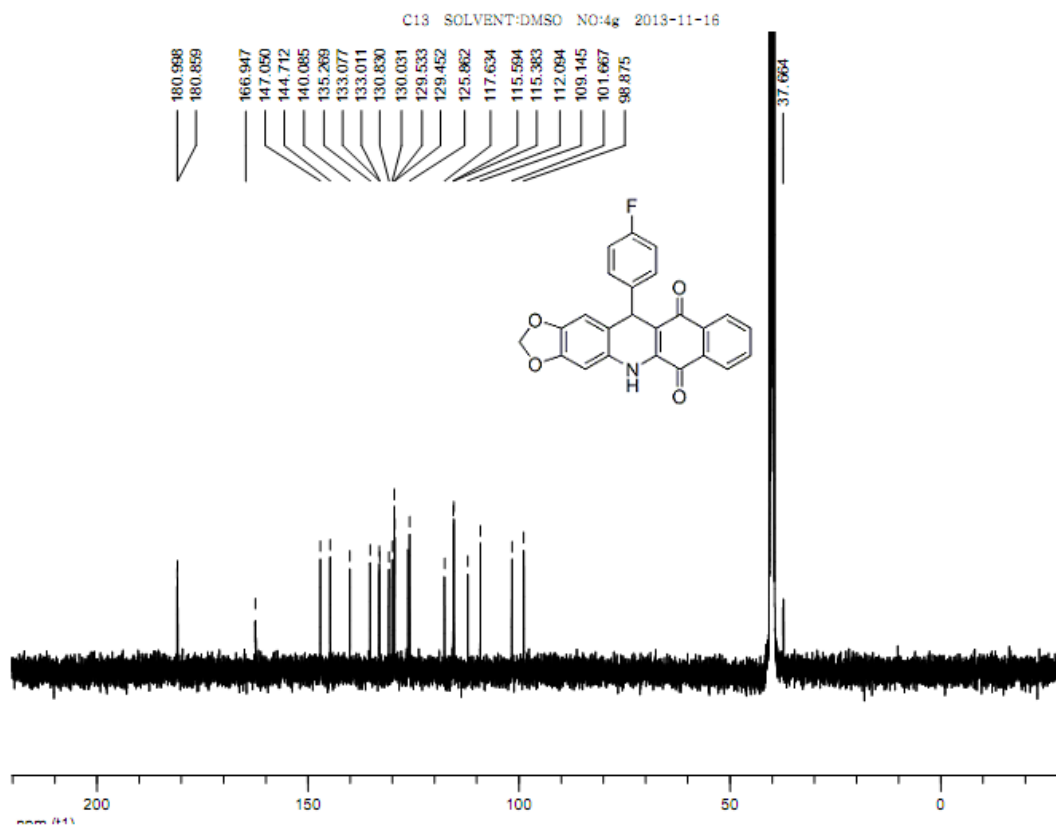

Figure 20.  $^{13}\text{C}$  NMR of 4g

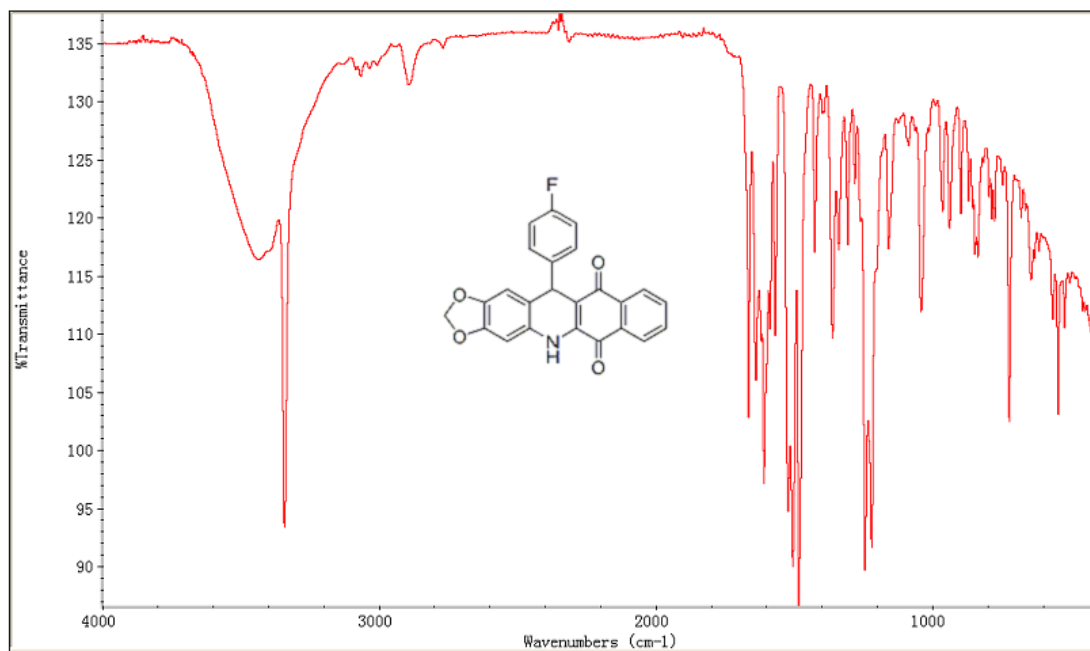

Figure 21. IR of 4g

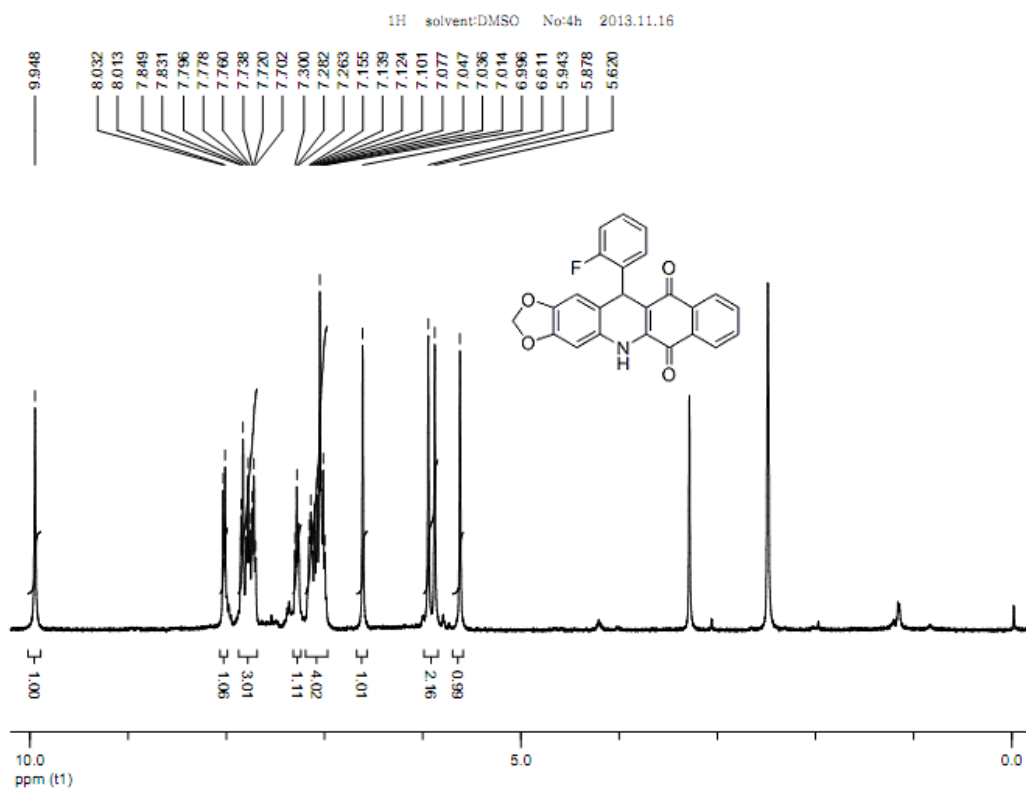

Figure 22.  $^1\text{H}$  NMR of 4h

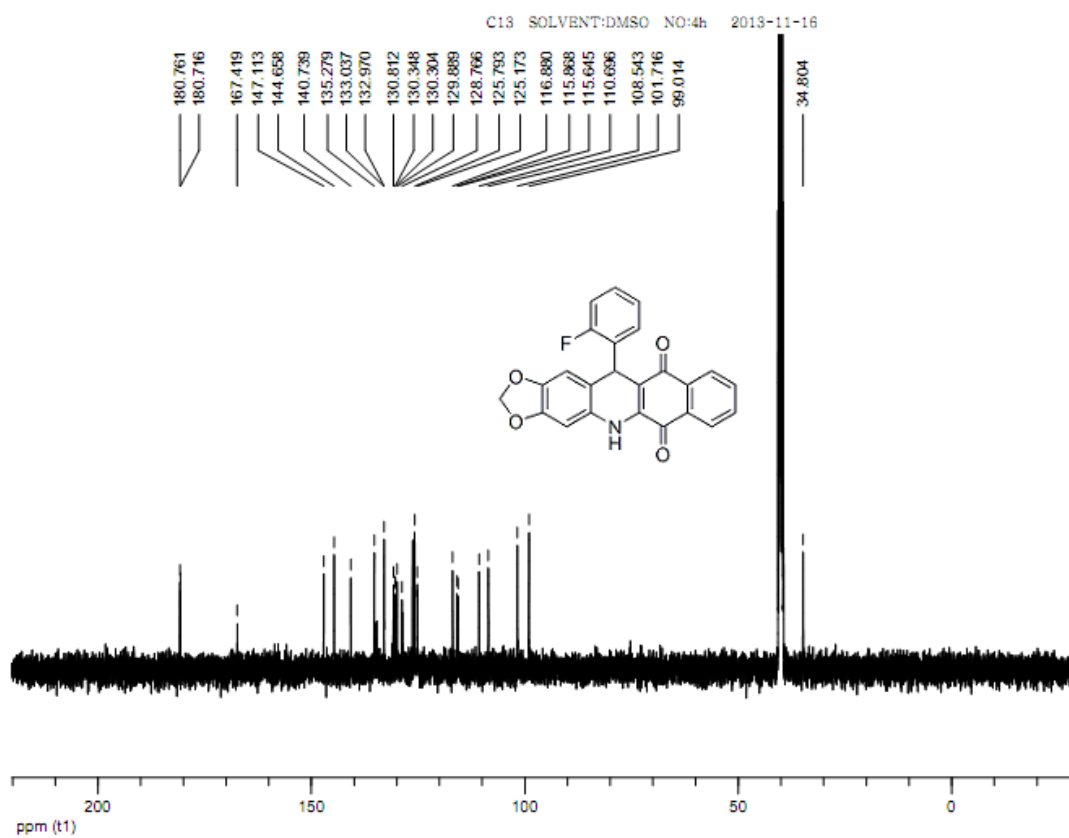

Figure 23.  $^{13}\text{C}$  NMR of 4h

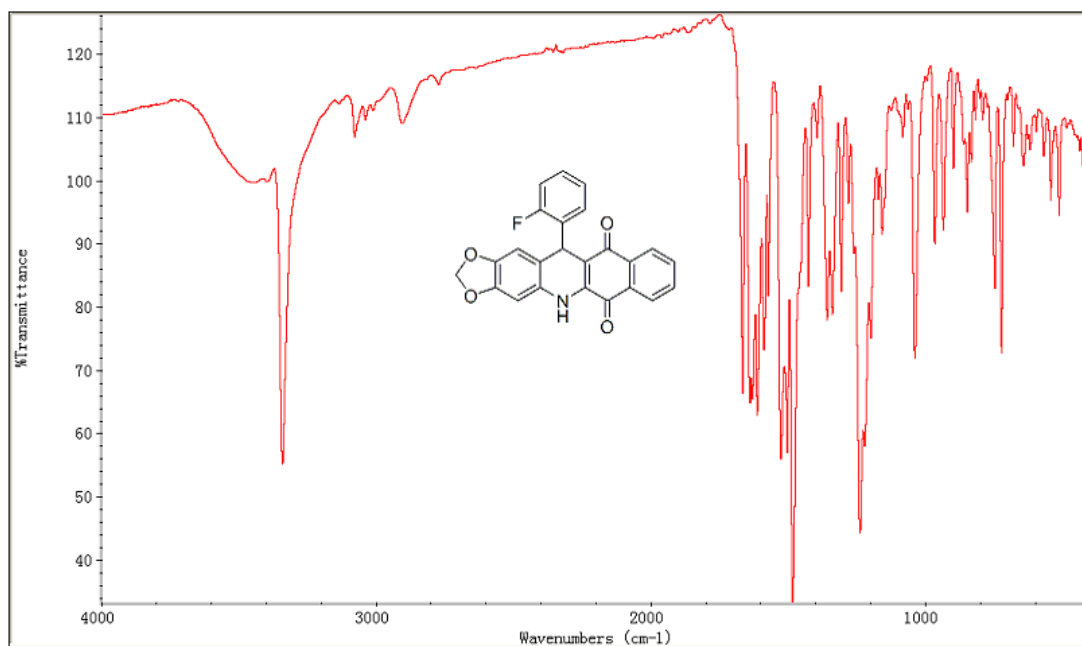

Figure 24. IR of 4h

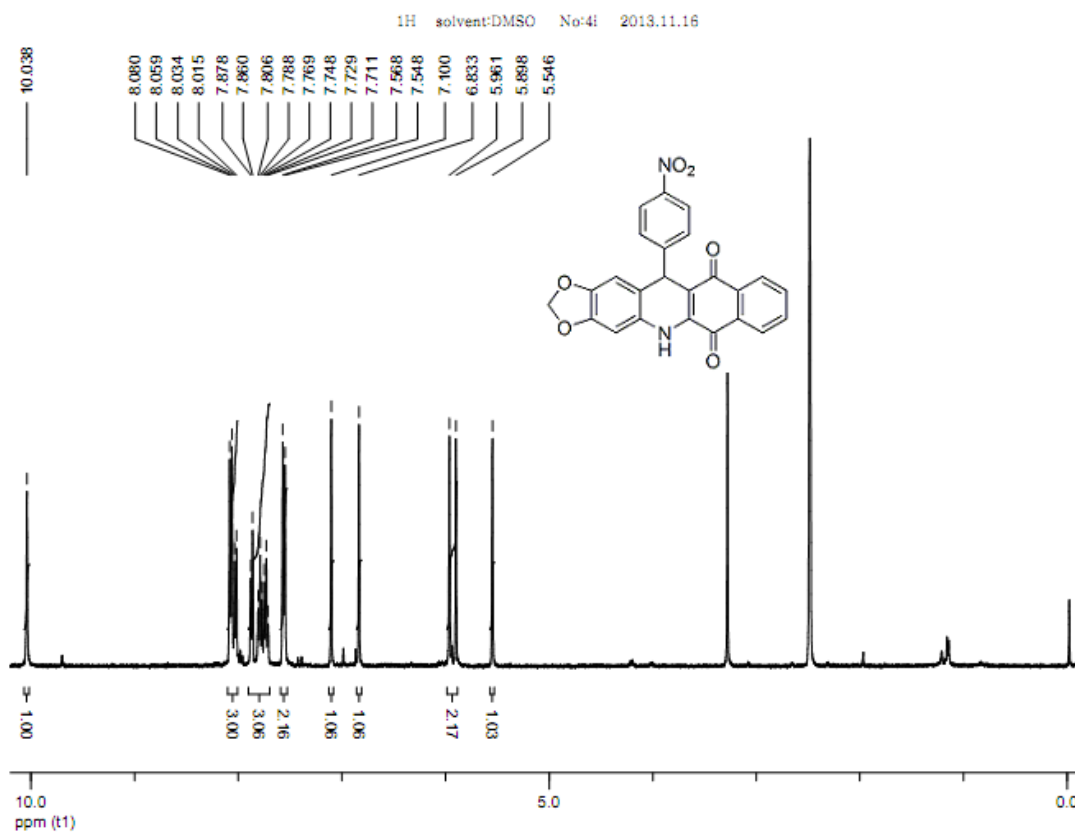

Figure 25. <sup>1</sup>H NMR of 4i

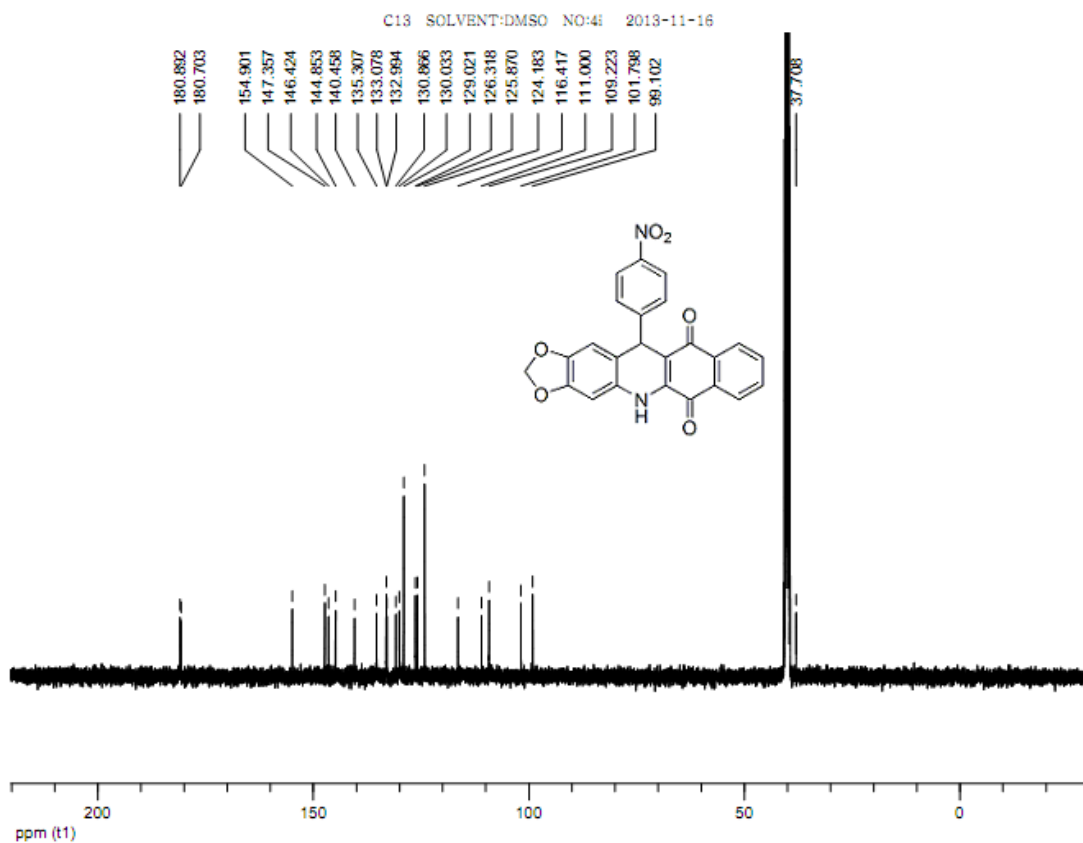

Figure 26.  $^{13}\text{C}$  NMR of 4i

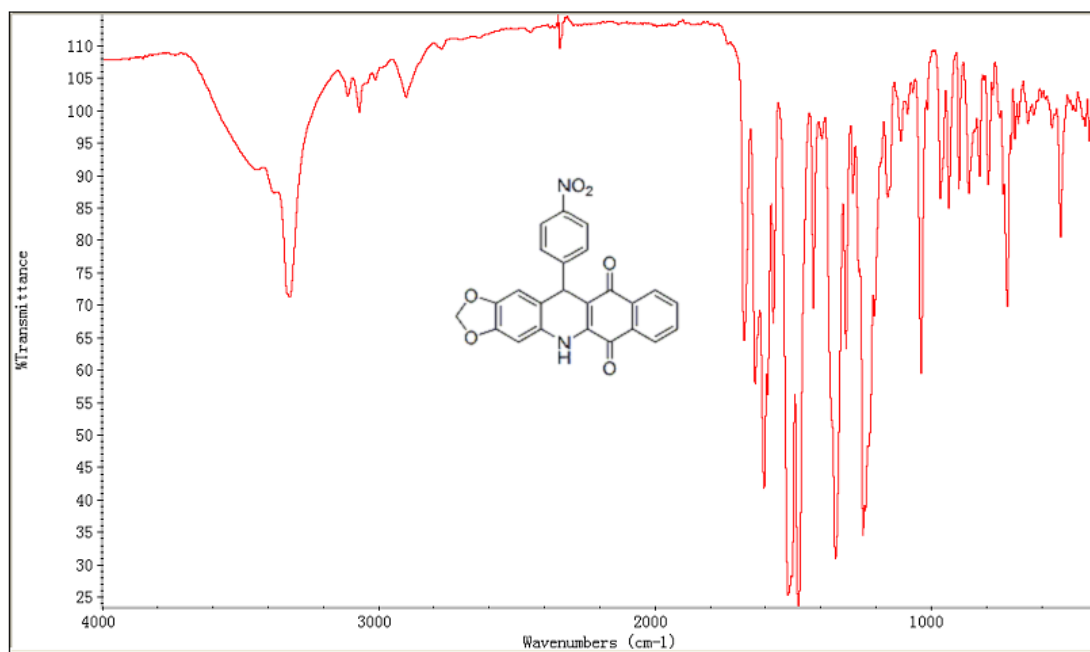

Figure 27. IR of 4i

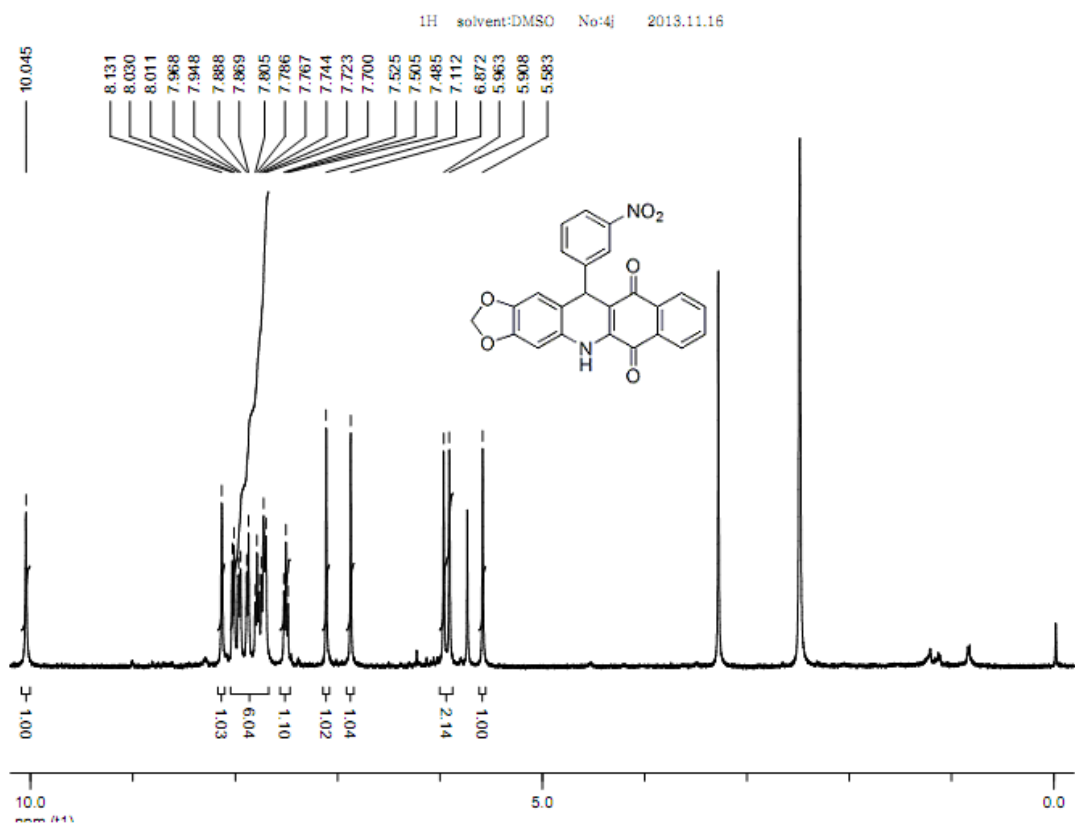

Figure 28. <sup>1</sup>H NMR of 4j

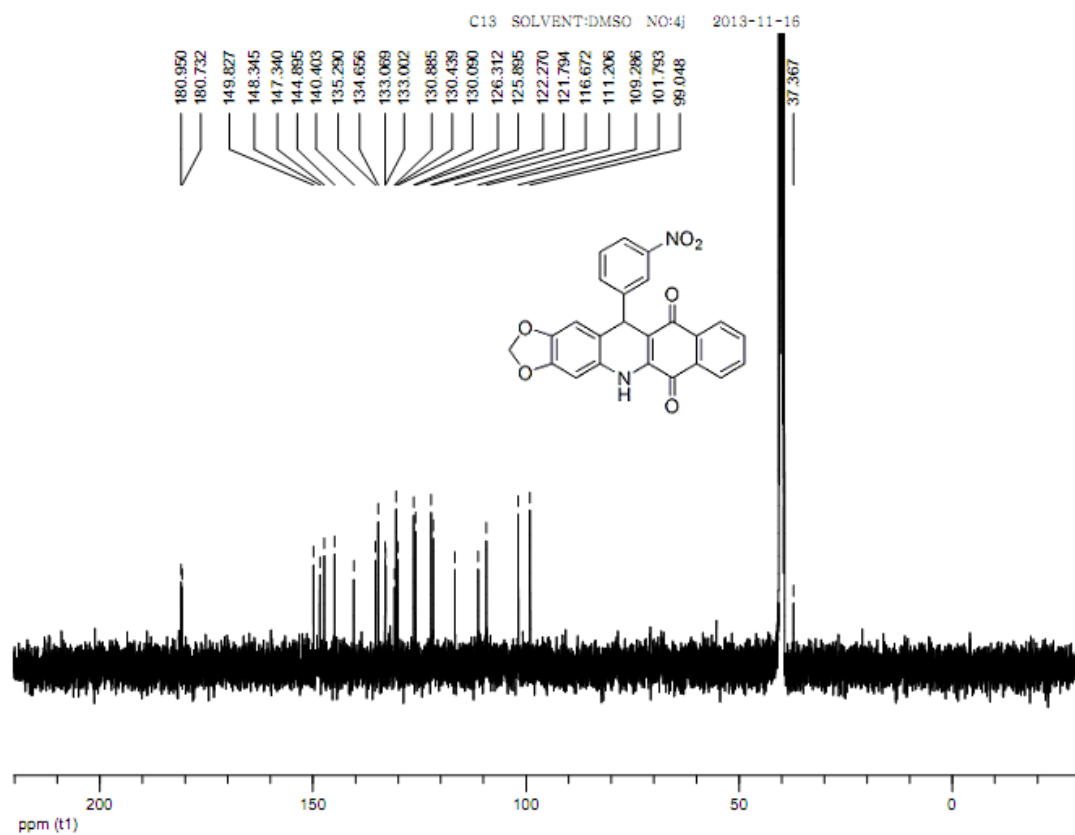

Figure 29. <sup>13</sup>C NMR of 4j

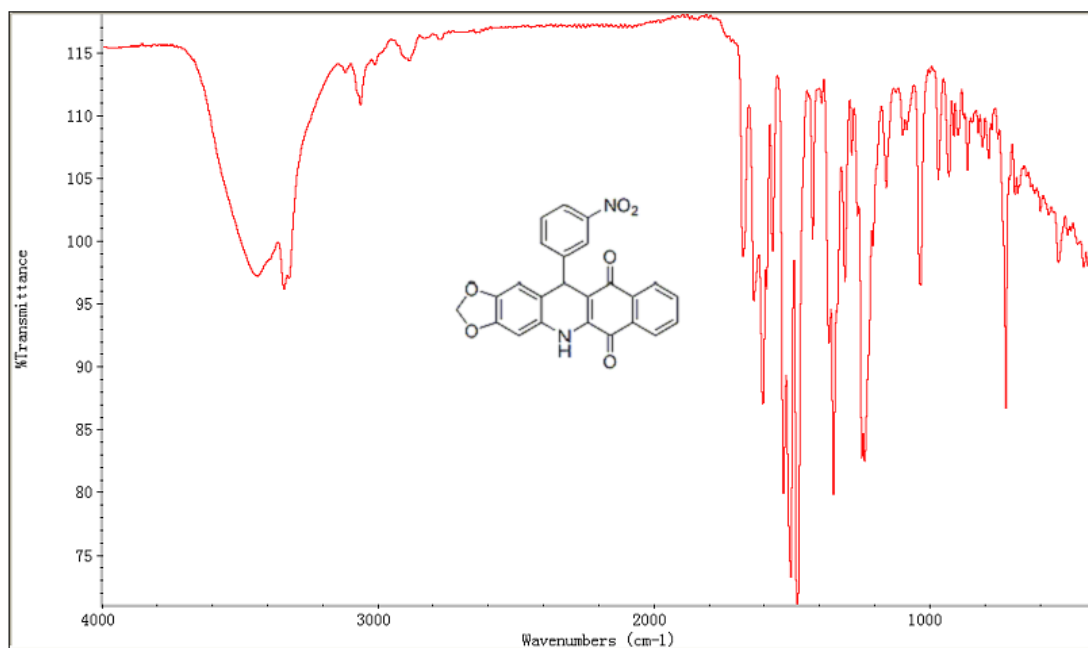

Figure 30. IR of 4j

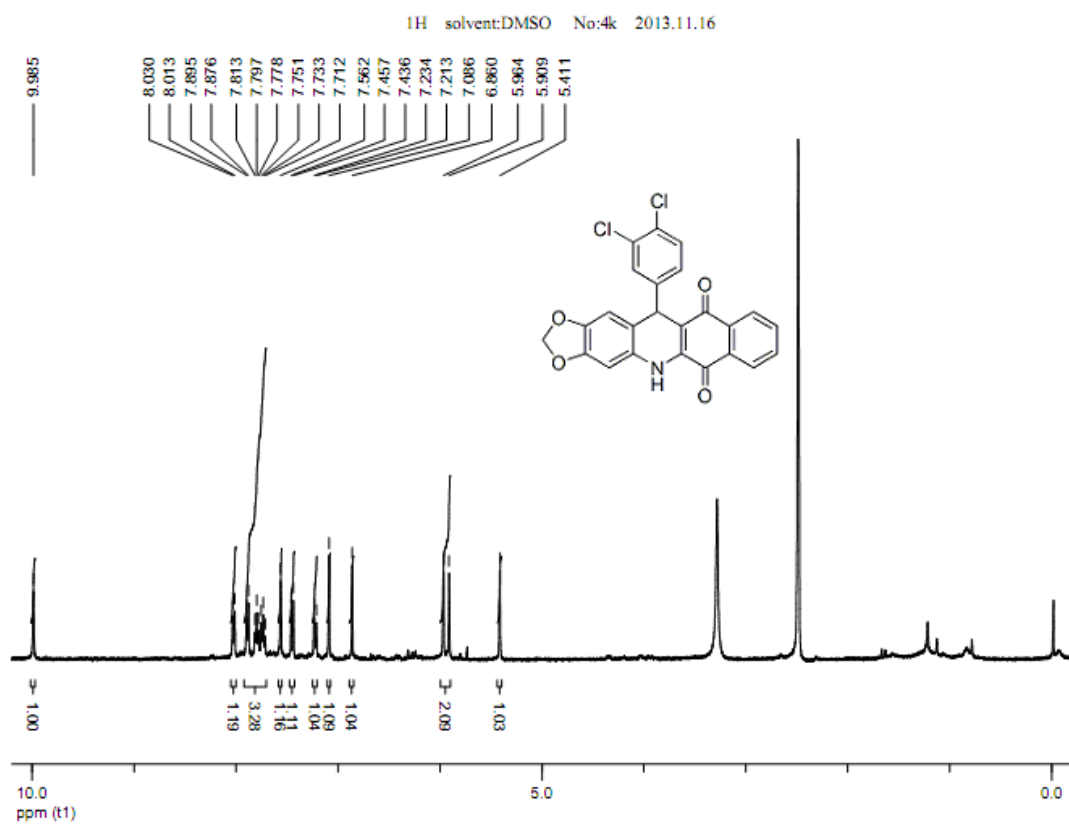

Figure 31. <sup>1</sup>H NMR of 4k



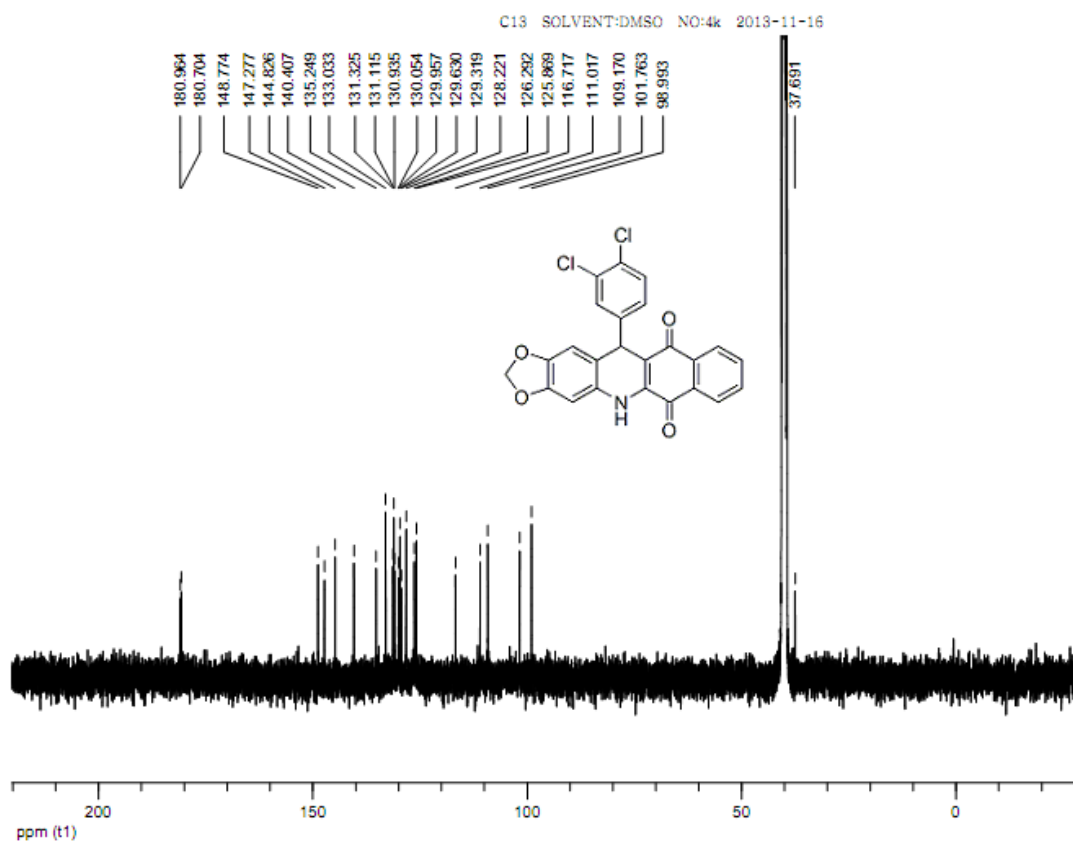

Figure 32.  $^{13}\text{C}$  NMR of 4k

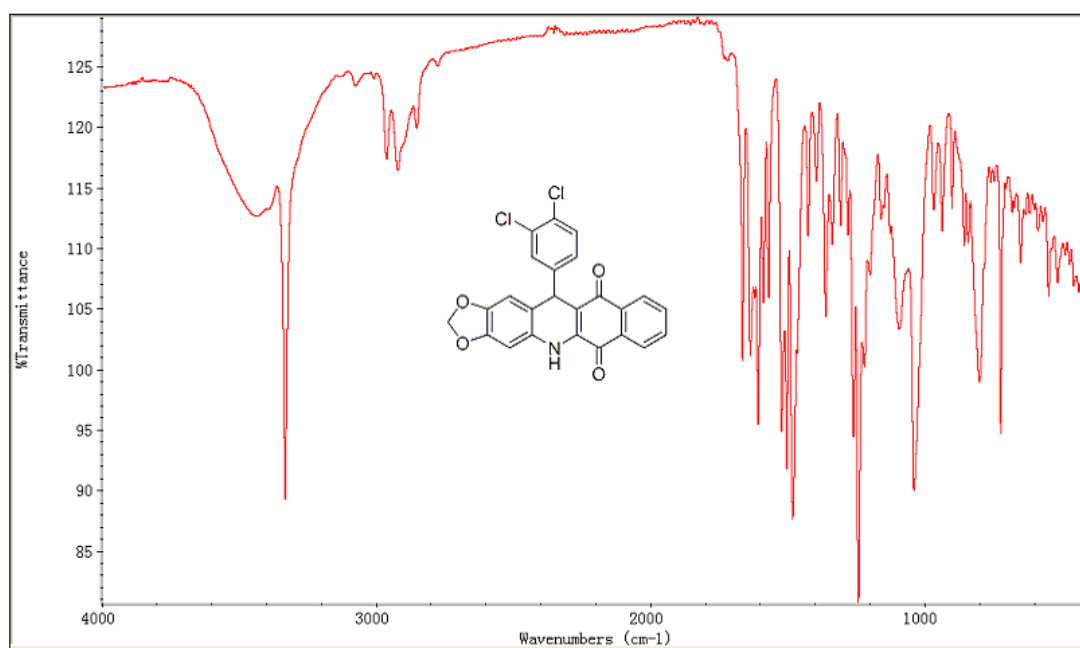

Figure 33. IR of 4k



Figure 35. <sup>13</sup>C NMR of 4l

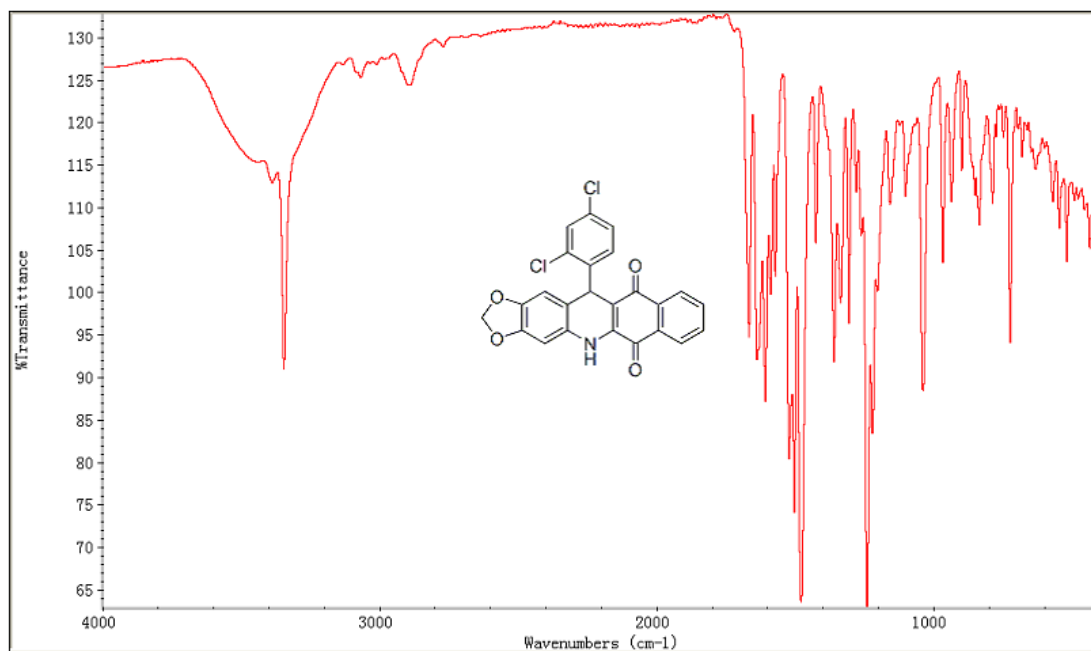

Figure 36. IR of 4l

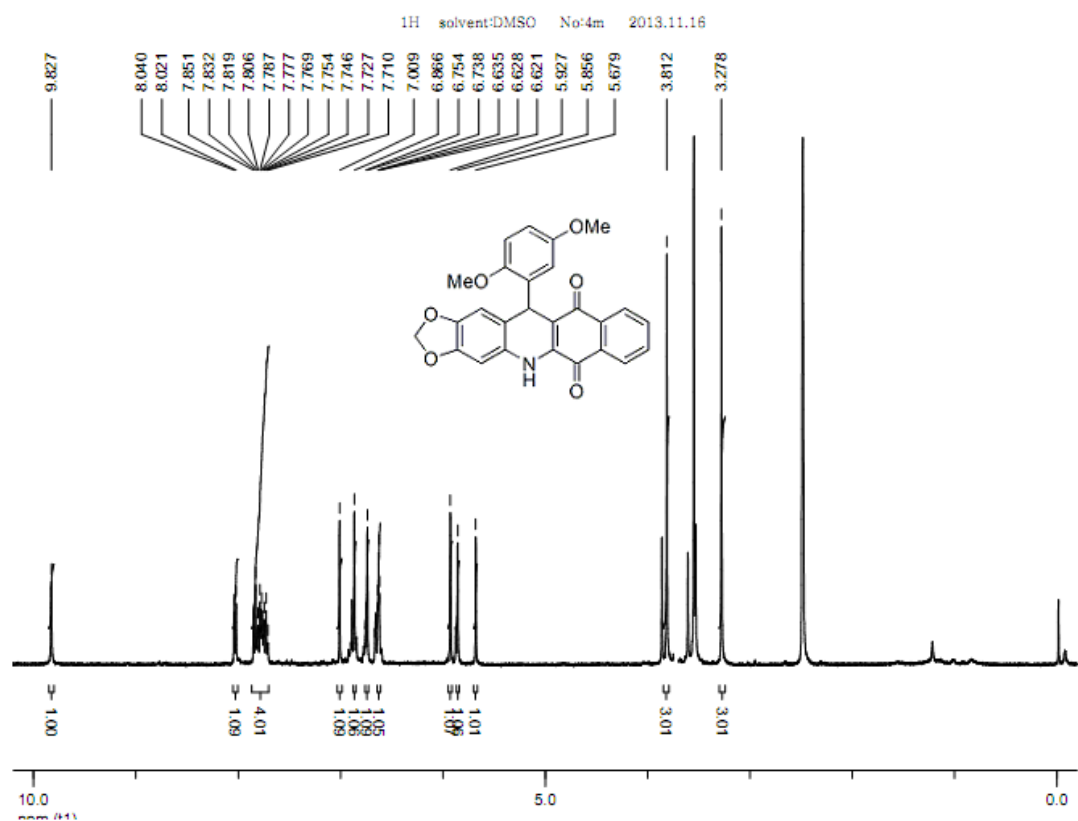

Figure 37. <sup>1</sup>H NMR of 4m

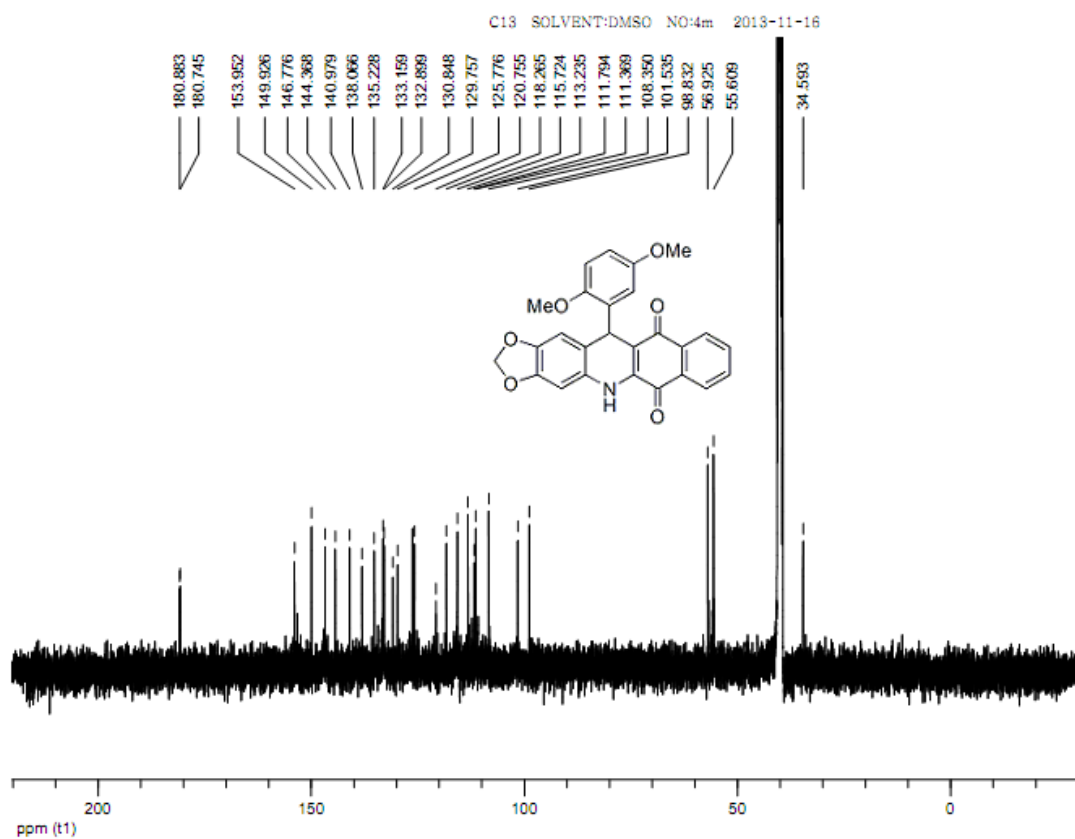

Figure 38.  $^{13}\text{C}$  NMR of 4m

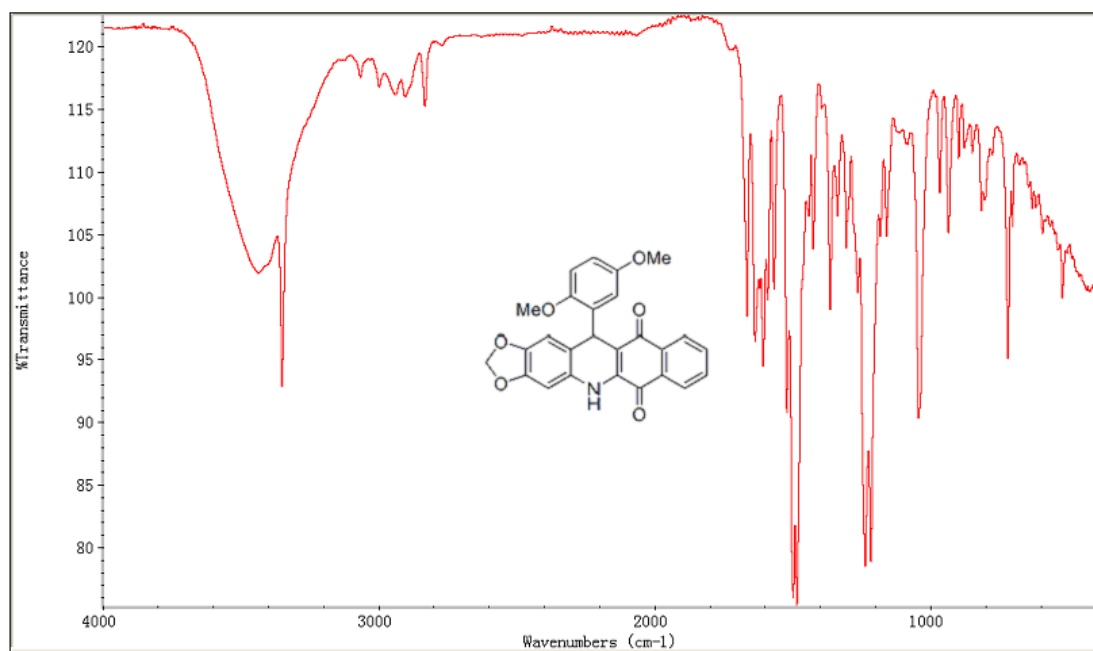

Figure 39. IR of 4m

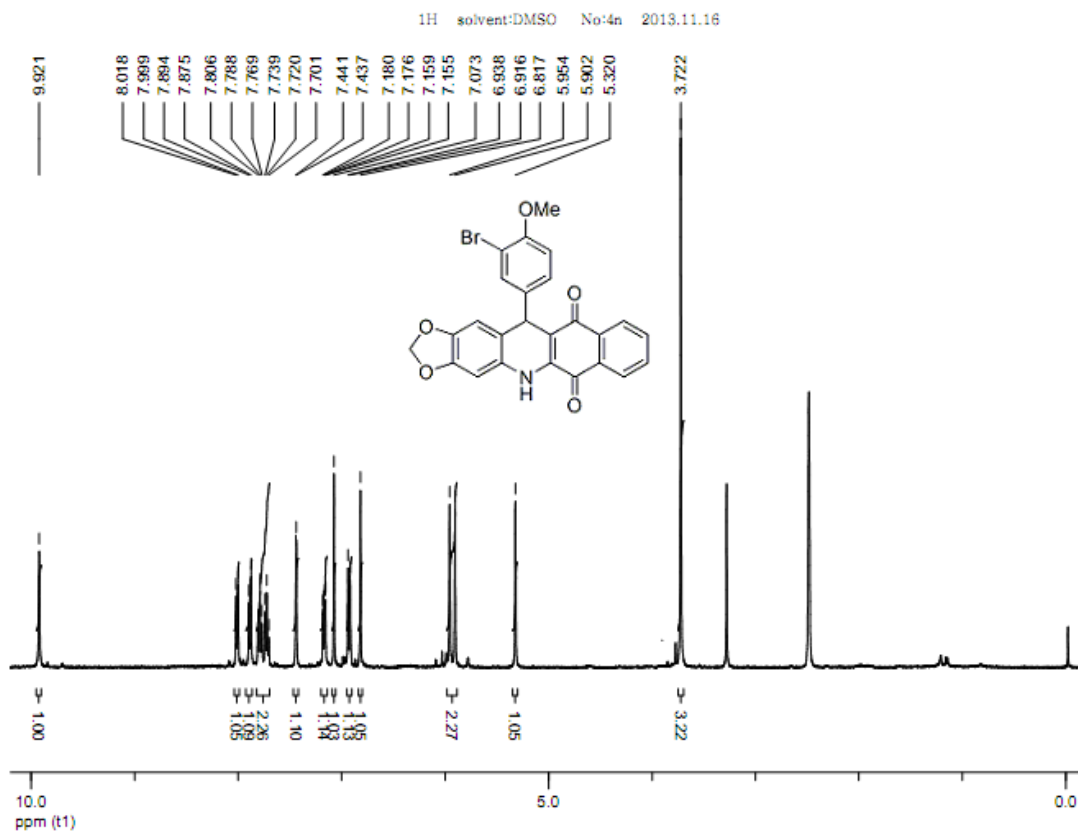

Figure 40. <sup>1</sup>H NMR of 4n

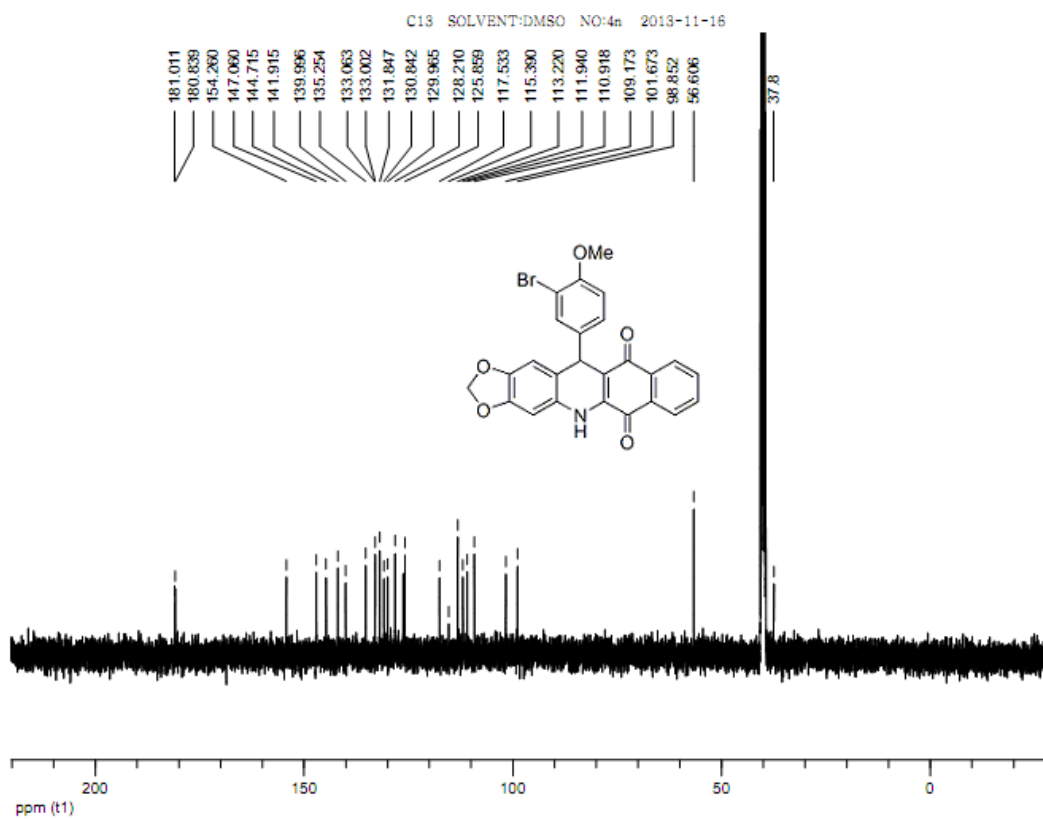

Figure 41. <sup>13</sup>C NMR of 4n

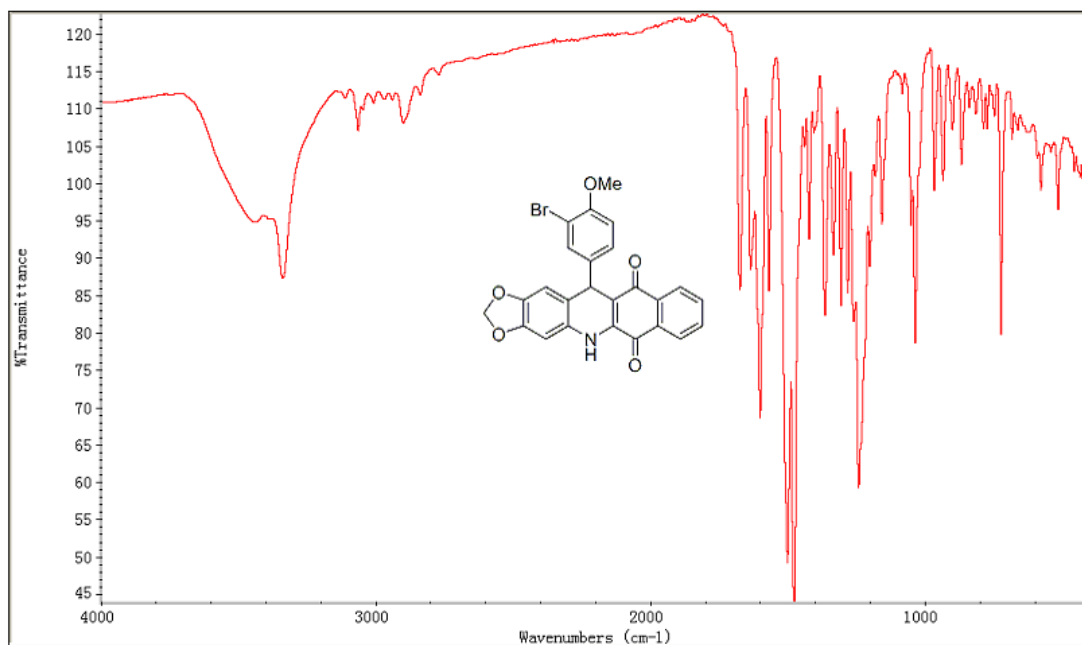

Figure 42. IR of 4n

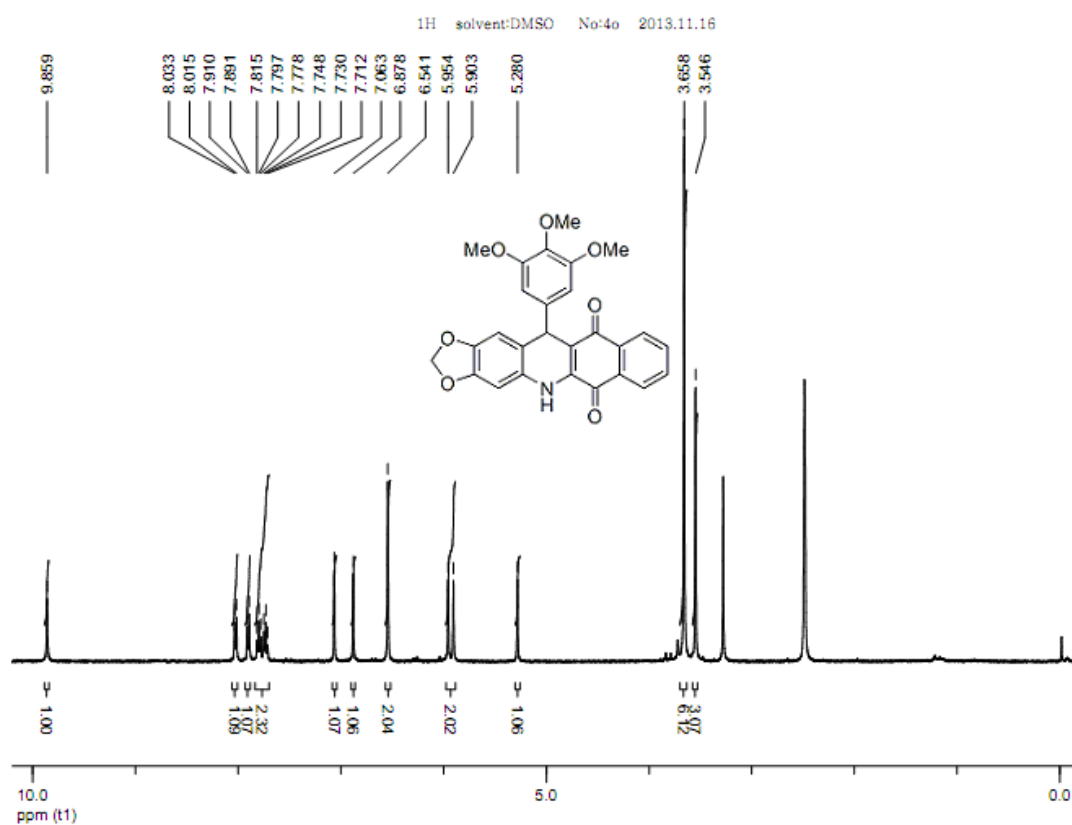

Figure 43. <sup>1</sup>H NMR of 4o

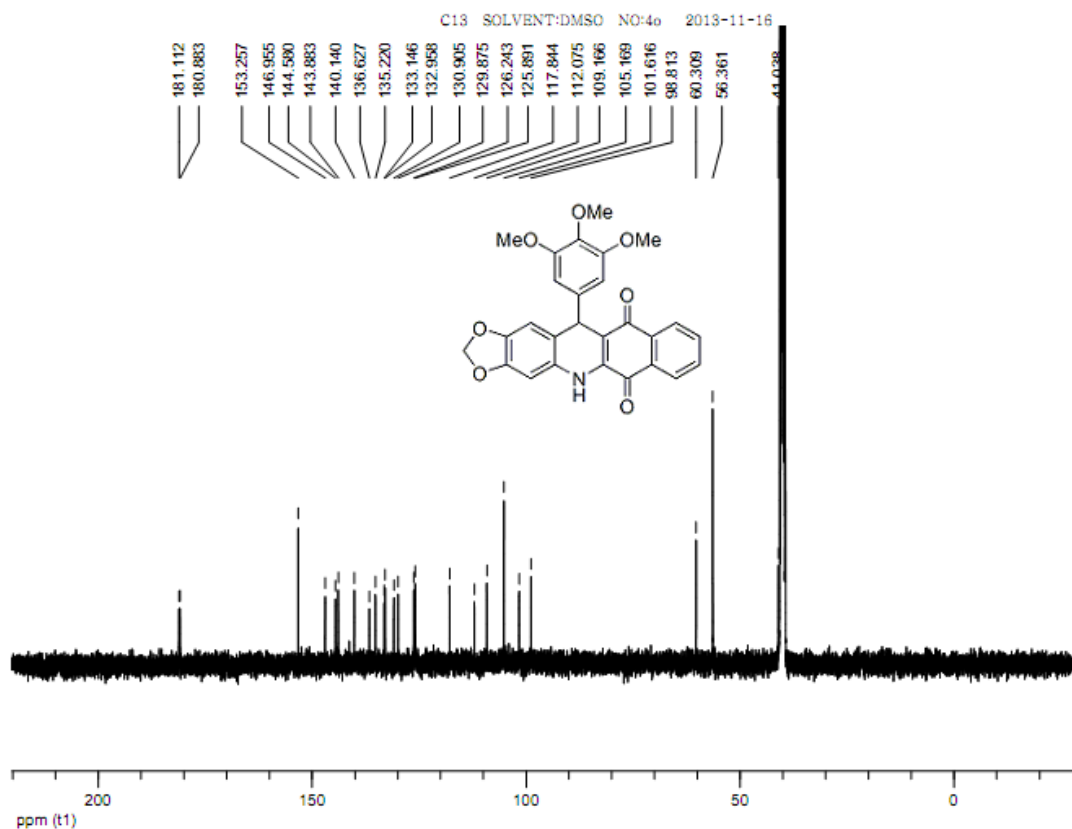

Figure 44.  $^{13}\text{C}$  NMR of 4o

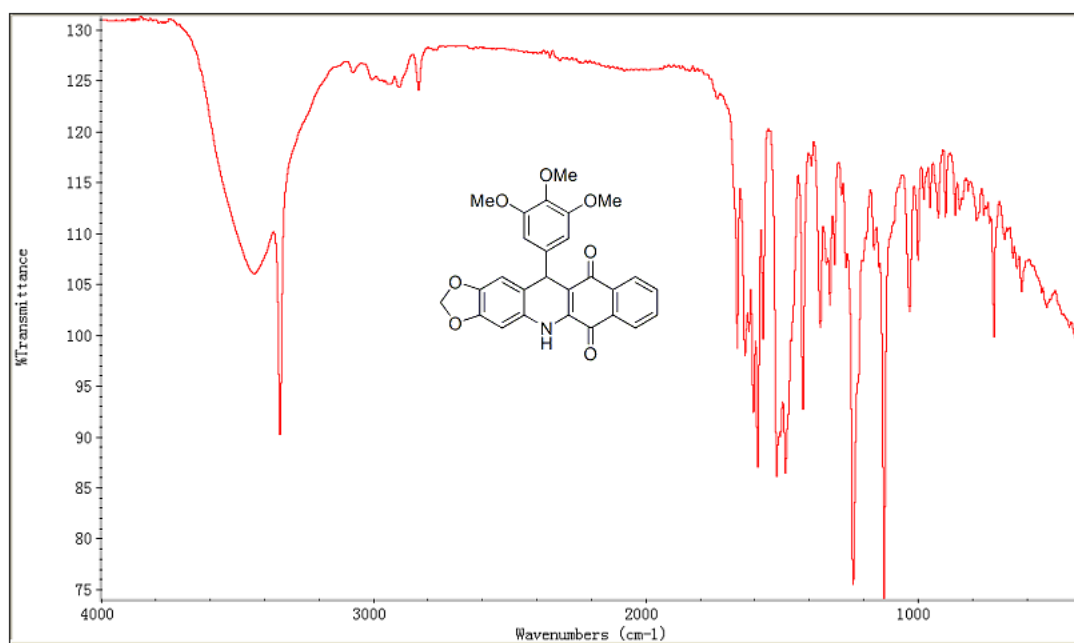

Figure 45. IR of 4o

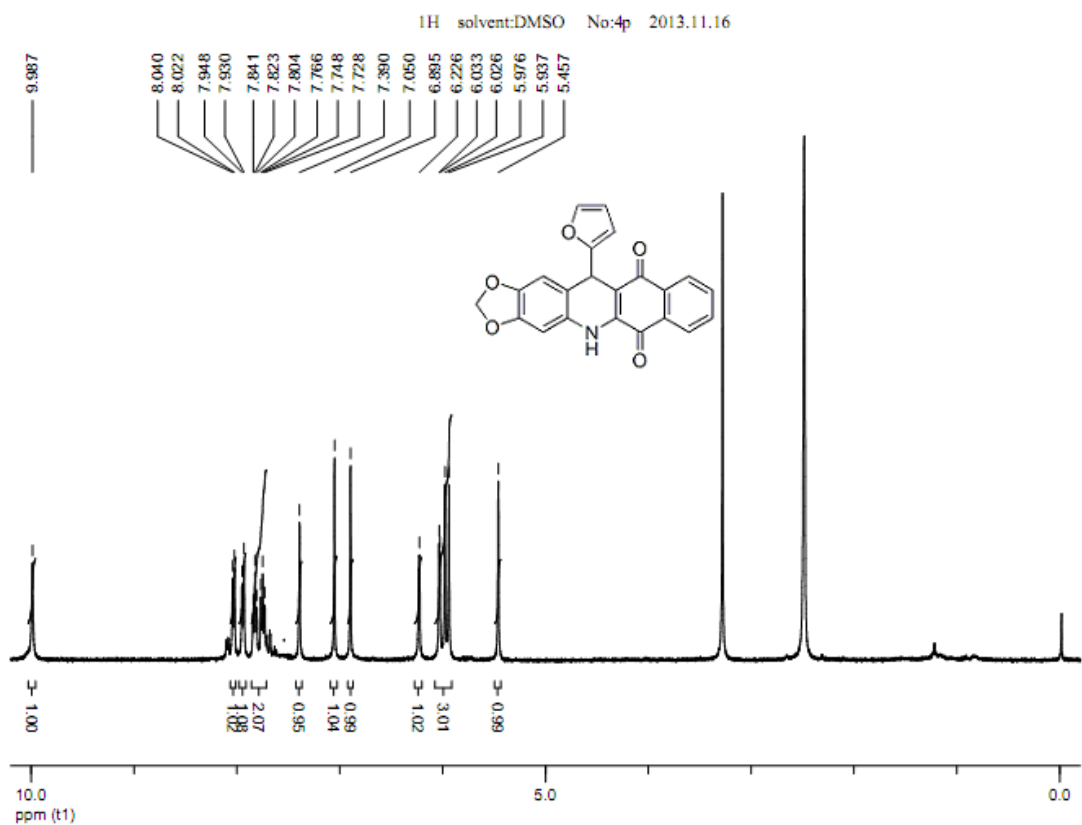

Figure 46. <sup>1</sup>H NMR of 4p

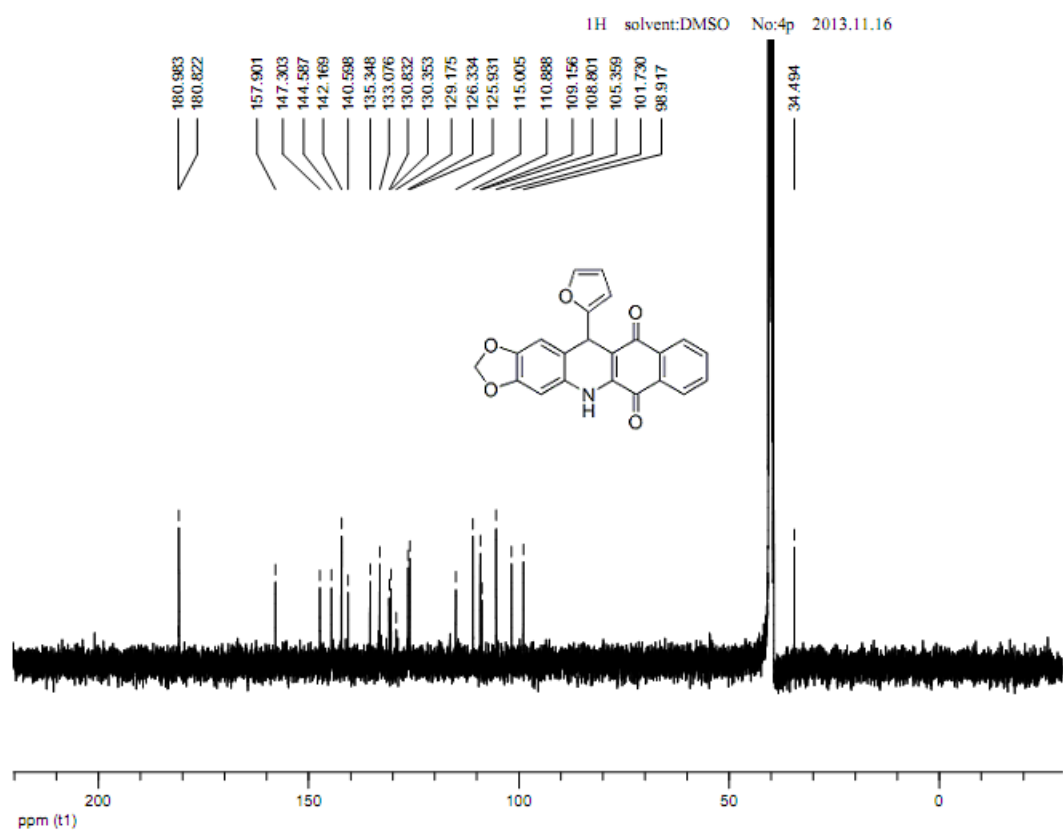

Figure 47. <sup>13</sup>C NMR of 4p



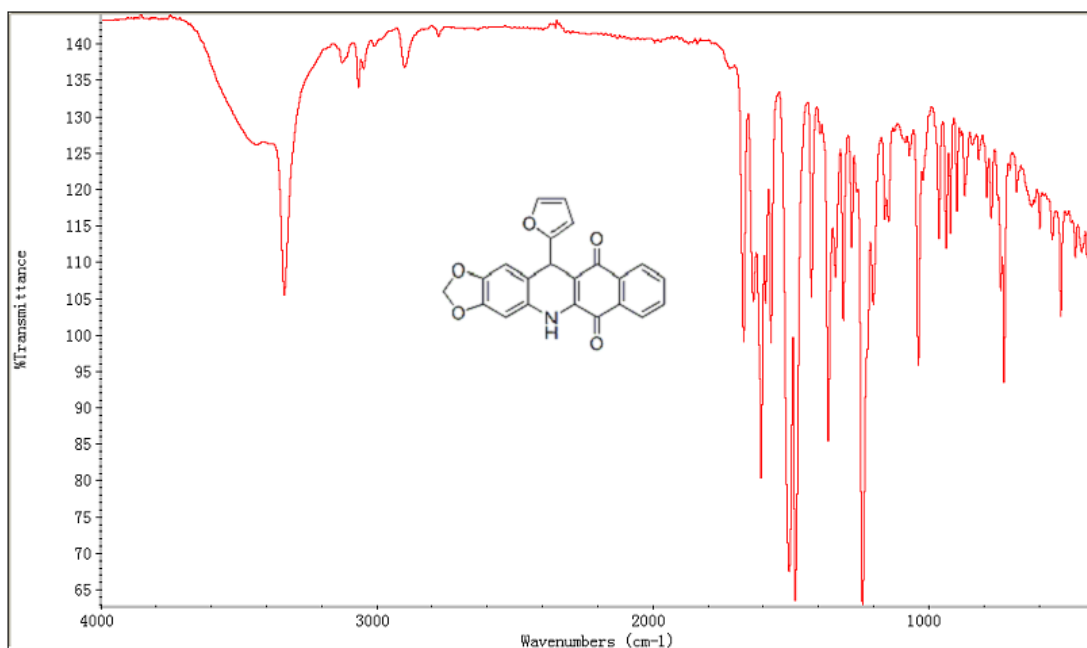

Figure 48. IR of 4p

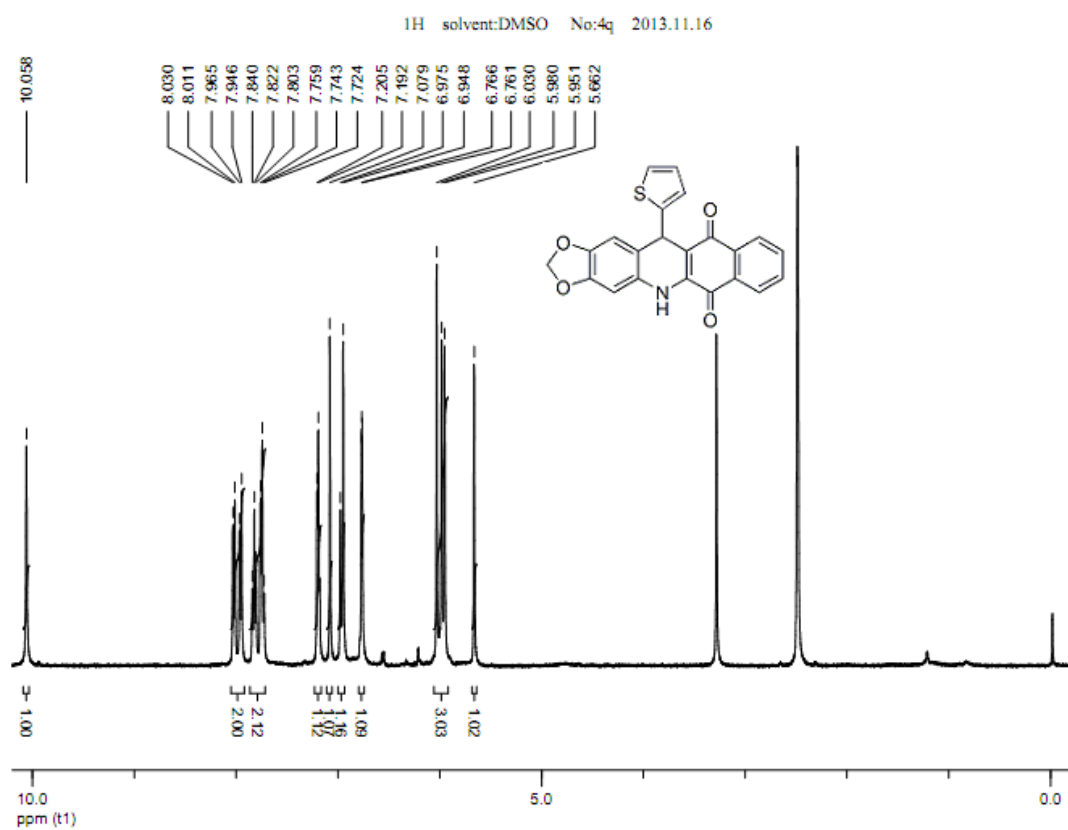

Figure 49. <sup>1</sup>H NMR of 4q

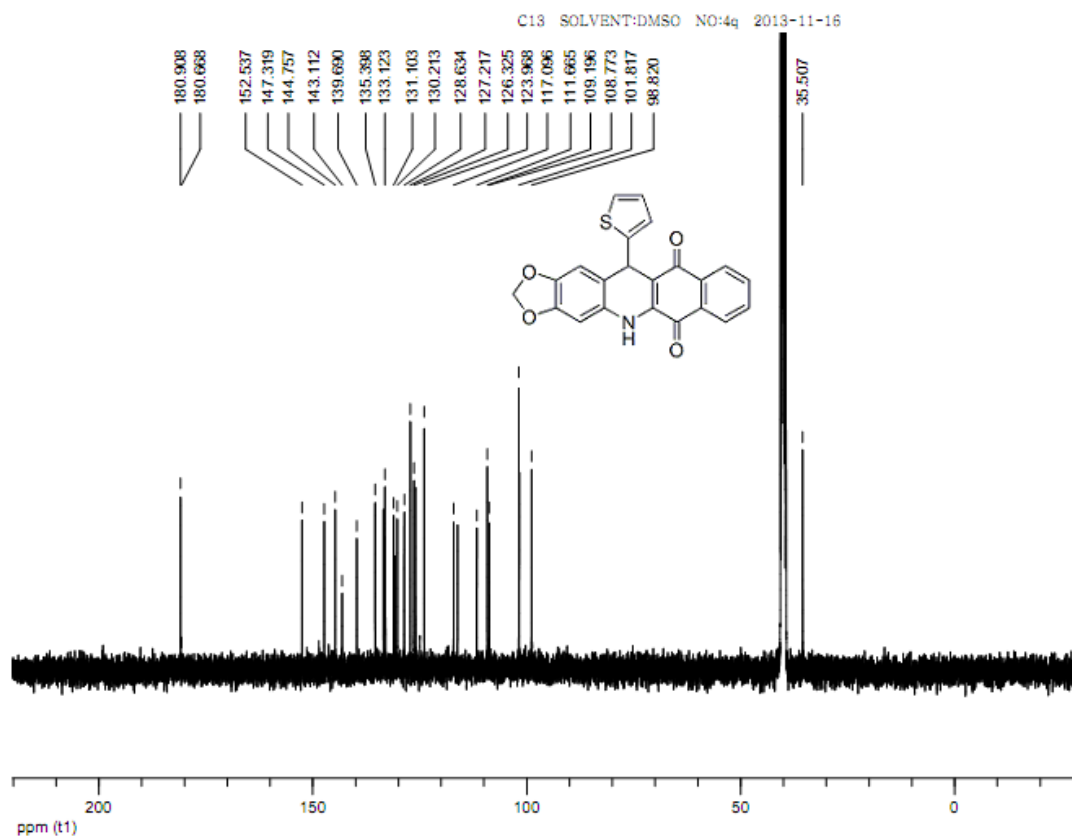

Figure 50.  $^{13}\text{C}$  NMR of 4q

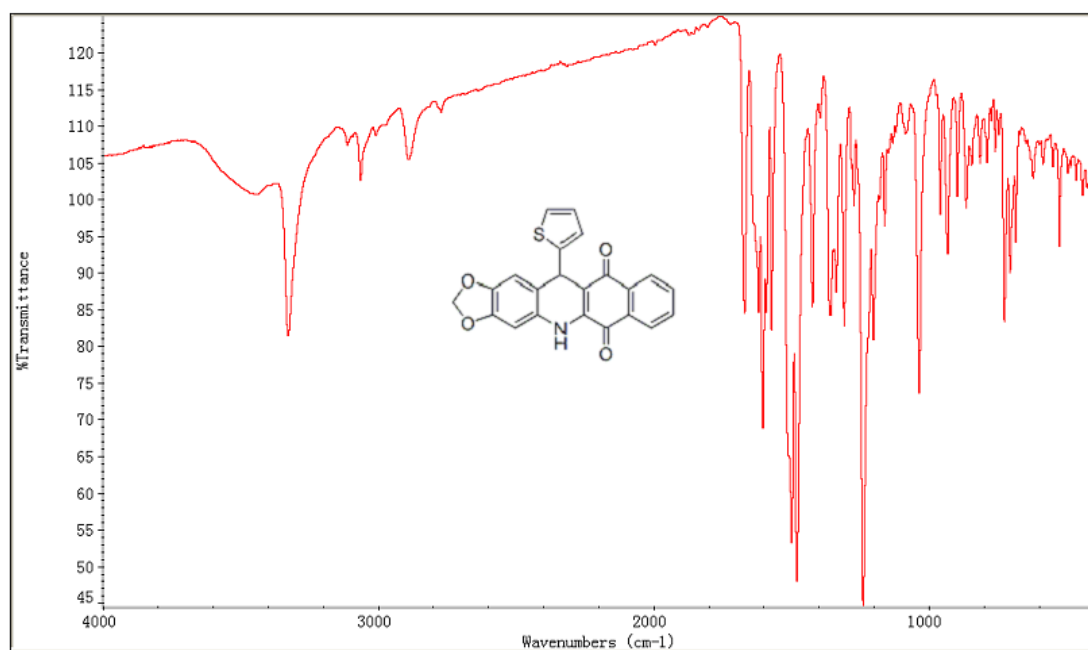

Figure 51. IR of 4q

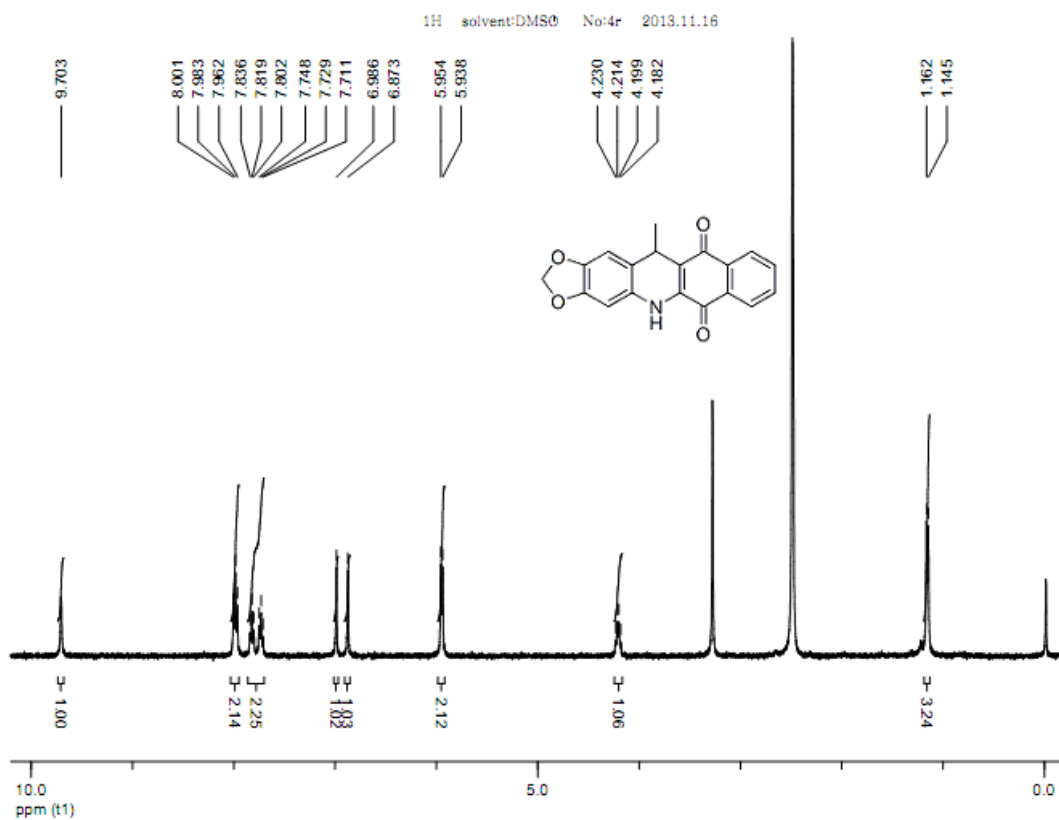

Figure 52.  $^1\text{H}$  NMR of 4r

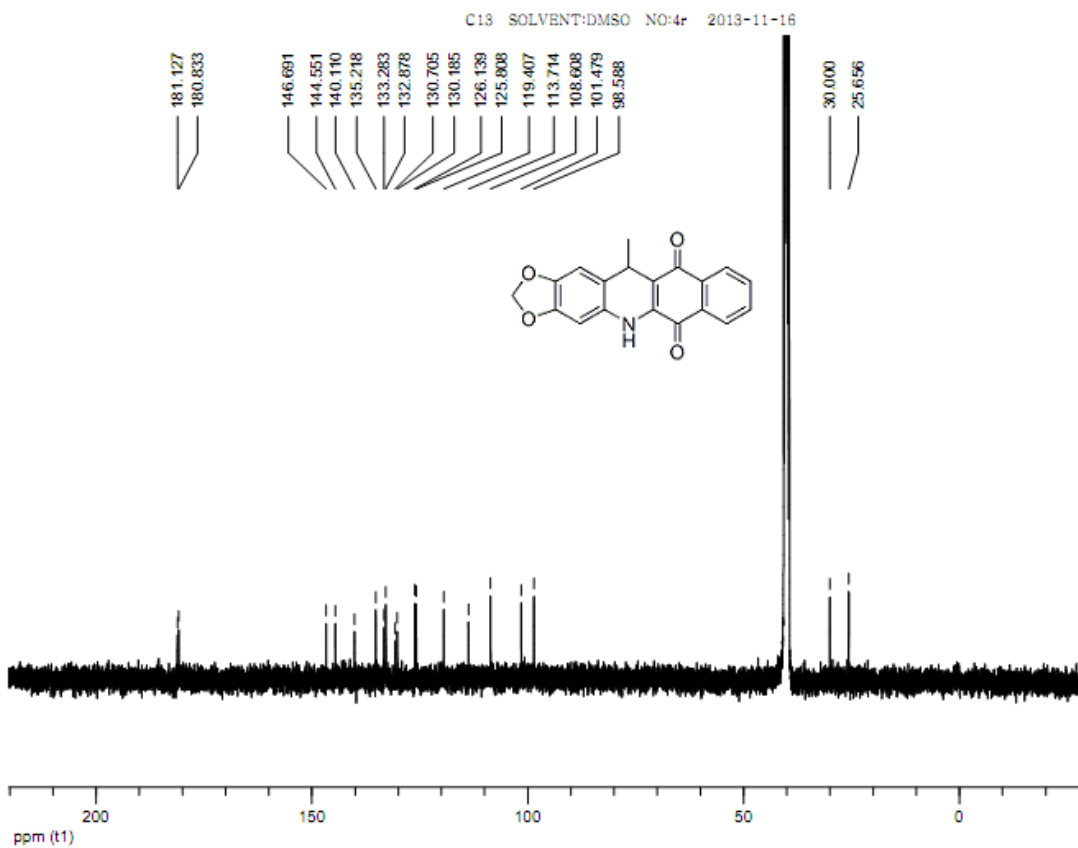

Figure 53.  $^{13}\text{C}$  NMR of 4r

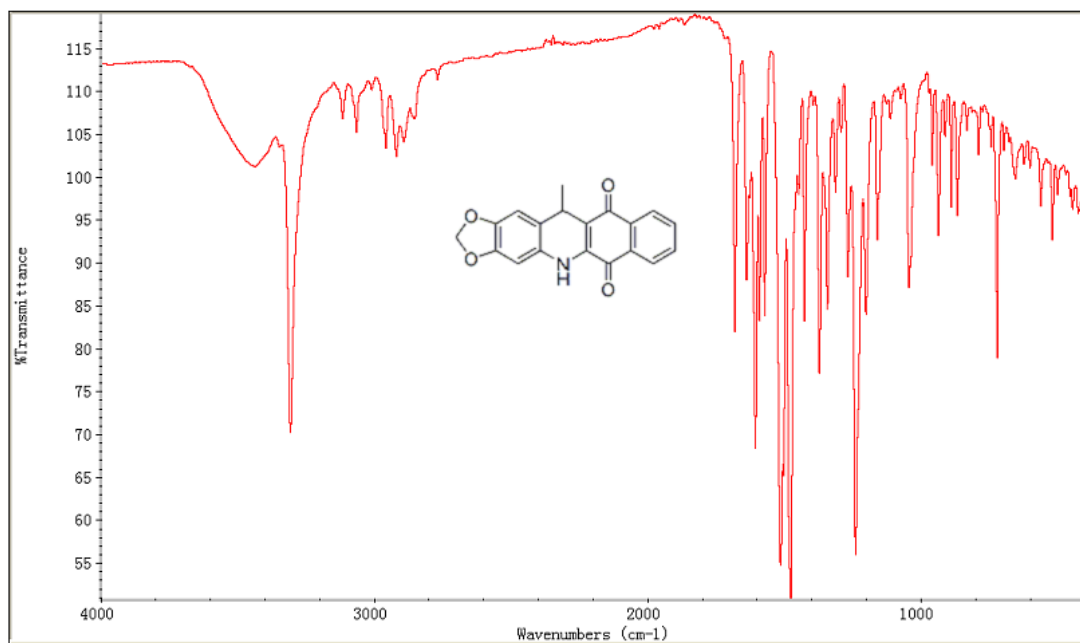

**Figure 54.** IR of 4r
